# Supplementary material for: Metabolic dysregulation in vitamin E and carnitine shuttle energy mechanisms associate with human frailty
Source: PubMed Central journal article supplement (PMC6831565; doi:10.1038/s41467-019-12716-2), 2019-11-05
Supplement: 41467_2019_12716_MOESM1_ESM.pdf [file 41467_2019_12716_MOESM1_ESM.pdf]

1 **SUPPLEMENTARY INFORMATION**

2

3 **Metabolic dysregulation in Vitamin-E and carnitine shuttle energy mechanisms**  
4 **associate with human frailty**

5 Rattray et al.

6

## 7 Supplementary Methods

8 Concentrations of serum based HDL cholesterol and triglycerides were measured using a  
9 Roche Modular Analyzer. High sensitivity C-reactive protein concentration was determined  
10 using Roche Modular P. The measurement of all biomarkers have been described in a number  
11 of official ELSA technical reports<sup>1,2</sup>.

12  
13 Cholesterol esters in each serum sample were hydrolysed by cholesterol esterase (CHE). The  
14 free cholesterol produced was oxidised by cholesterol oxidase (CHO) to cholestene-3-one with  
15 the simultaneous production of hydrogen peroxide ( $H_2O_2$ ). Subsequently oxidative coupling with  
16 4-aminophenazone and phenol in the presence of peroxidase (POD) yielded Quinoneimine, a  
17 chromophore that was measured spectrophotometrically at 505 / 700 nm as an increase in  
18 absorbance. In the presence of  $Mg^{2+}$ , dextran sulfate selectively formed water-soluble  
19 complexes with LDL which are resistant to PEG-modified enzymes. The cholesterol  
20 concentration of HDL-cholesterol was determined enzymatically by cholesterol esterase and  
21 cholesterol oxidase coupled with PEG to associated amino groups (approx. 40%). Cholesterol  
22 esters were broken down quantitatively into free cholesterol and fatty acids by cholesterol  
23 esterase. In the presence of oxygen, cholesterol was oxidized by cholesterol oxidase to  $\Delta^4$ -  
24 cholestenone and hydrogen peroxide. In the presence of this peroxidase, hydrogen peroxide  
25 generated reacted with 4-amino-antipyrine and HSDA to form a purple-blue dye. The color  
26 intensity of this dye was measured bichromatically at 600 / 700 nm and assumed directly  
27 proportional to the cholesterol concentration. Similarly, triglycerides were hydrolysed by a  
28 combination of microbial lipases to yield glycerol and fatty acids. Glycerol was phosphorylated  
29 by adenosine triphosphate(ATP) in the presence of glycerol kinase (GK) to produce glycerol-3-  
30 phosphate. Glycerol-3-phosphate was oxidised by molecular oxygen in the presence of glycerol  
31 phosphate oxidase (GPO) to produce hydrogen peroxide ( $H_2O_2$ ) and dihydroxyacetone  
32 phosphate. The formed  $H_2O_2$  reacted with 4-aminophenazone and 4-chlorophenol in the  
33 presence of peroxidase to produce a chromophore. The increase in absorbance at 505 / 700 nm  
34 was measured proportional to the triglyceride content of the sample.

35 Measurement of Insulin like Growth Factor 1 (IGF-1) was made by an IDS iSYS immunoassay  
36 analyser assay. Samples were incubated under acidic conditions to dissociate IGF-I from the  
37 binding proteins. A portion of this, along with neutralisation buffer, a biotinylated anti-IGF-I  
38 monoclonal antibody and an acridinium labelled anti IGF-I monoclonal antibody were incubated  
39 together. Streptavidin labelled magnetic particles were then added and following a further  
40 incubation step, the magnetic particles were captured. After washing, trigger reagents were  
41 added and the light emitted was directly proportional to the [IGF-I] in the original sample. The  
42 assay represents a new generation of assay which was calibrated to the new WHO international  
43 standard for insulin-like Growth Factor-I, NIBSC code: 02/254. The assay also conforms to the  
44 2011 consensus statement on GH and IGF-I assays.

45 Measurement of HbA1c were made using a Glycohemoglobin Analyser TOSOH HLC-723G8.  
46 Ion exchange high performance liquid chromatography (HPLC) was used for the automatic  
47 separation of haemoglobin A1c (HbA1c). Whole blood was sampled directly from the primary  
48 tube, diluted in haemolysing buffer and pumped via a pre-filter to the ion-exchange column. A  
49 series of three G8 Variant elution buffers of differing ionic strengths provide a stepped gradient  
50 with which the haemoglobin fractions were eluted from the column. There was no pre-treatment

51 of the sample to remove the labile A1c as this elutes as a separate peak. Peaks were detected  
52 by dual wavelength measurement and quantitated using calibrators aligned to IFCC values.

53 Measurement of Haemoglobin was performed on a Sysmex XE-2100 Analyser. Whole blood  
54 was aspirated to the rotor valve. 3.0  $\mu$ L of whole blood was then diluted to a ratio of 1:333 with  
55 0.9970 mL of the isotonic Cellpack reagent. This was then sent to the flowcell. At the same time  
56 0.5 mL of Sulfolyser was added to haemolyse the red blood cells to make a 1:500 diluted  
57 sample, and the haemoglobin was converted to SLS\_haemoglobin. The concentration of  
58 haemoglobin was subsequently measured as light absorbance (at 555 nm) and was calculated  
59 by comparison with the absorbance of the diluent measured before the sample was added.

60 Measurement of Fibrinogen was performed the on an ACL TOP CTS analyser. A 1 in 10 dilution  
61 of plasma in Factor diluent was made by aspirating 17  $\mu$ L of plasma and mixing it with 153  $\mu$ L of  
62 Factor Diluent. 100  $\mu$ L of the diluted plasma was then dispensed into a reaction cuvette and  
63 incubated for 60 s at 37°C. 50  $\mu$ L of Fibrinogen-C XL reagent was subsequently added and the  
64 reaction monitored at 405 nm for 120 s. The change in light transmission caused by the  
65 conversion of soluble Fibrinogen in plasma to cross-linked insoluble Fibrin was monitored by the  
66 analyser and the clotting time threshold was determined to be 37% of the total change. As the  
67 clotting time is directly related to the concentration of Fibrinogen in the plasma the time was  
68 converted to concentration in g/L by automatic use of a calibration curve.

69

70 **Supplementary Figures**

71

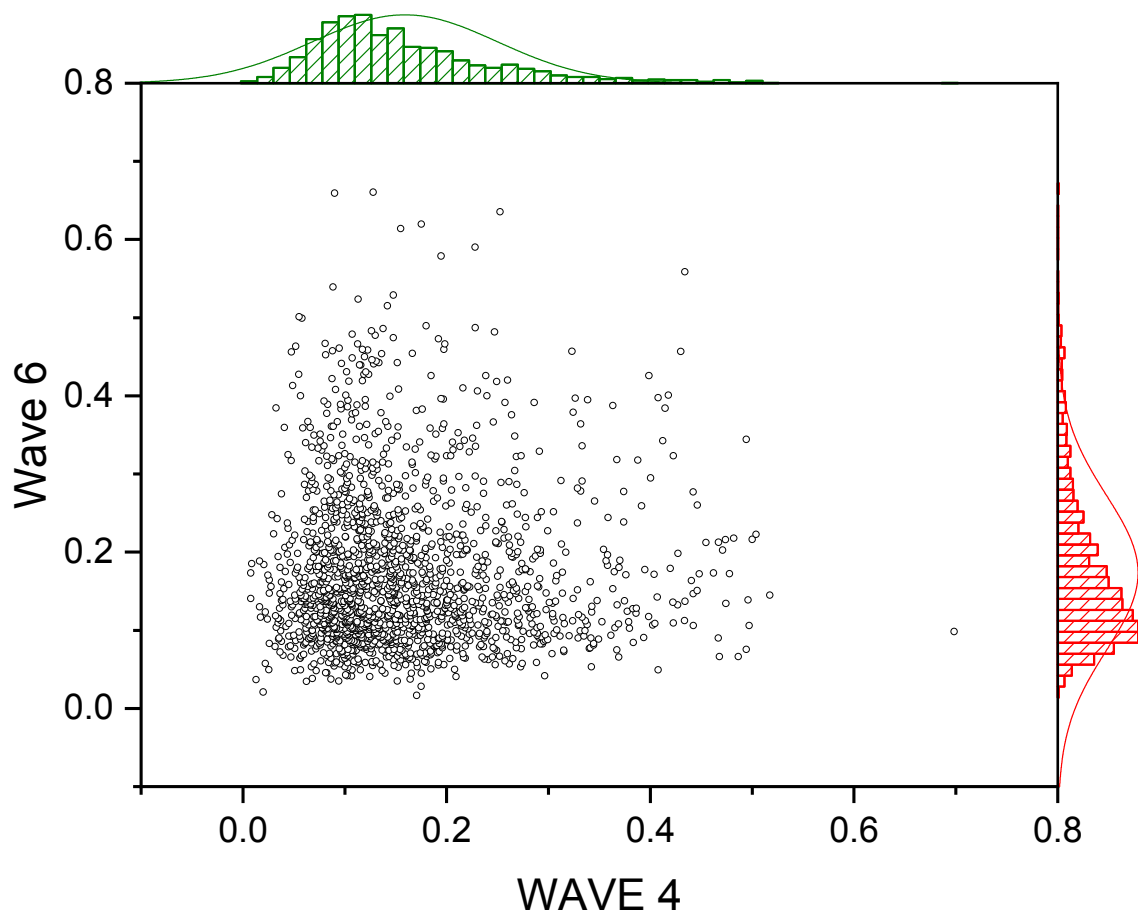

72

73 **Supplementary Figure 1|** Frailty indices produced from 1843 subjects within Wave 4 and 1753 subjects  
74 within Wave 6 of the English Longitudinal Study of Ageing. The observed unimodal right skewed  
75 distributions are comparable to those produced in other population scale assessments of frailty. Black  
76 circles represent the frailty index value of each subject. Green distribution = Wave 4. Red Distribution =  
77 Wave 6. Source data are provided as a Source Data file.

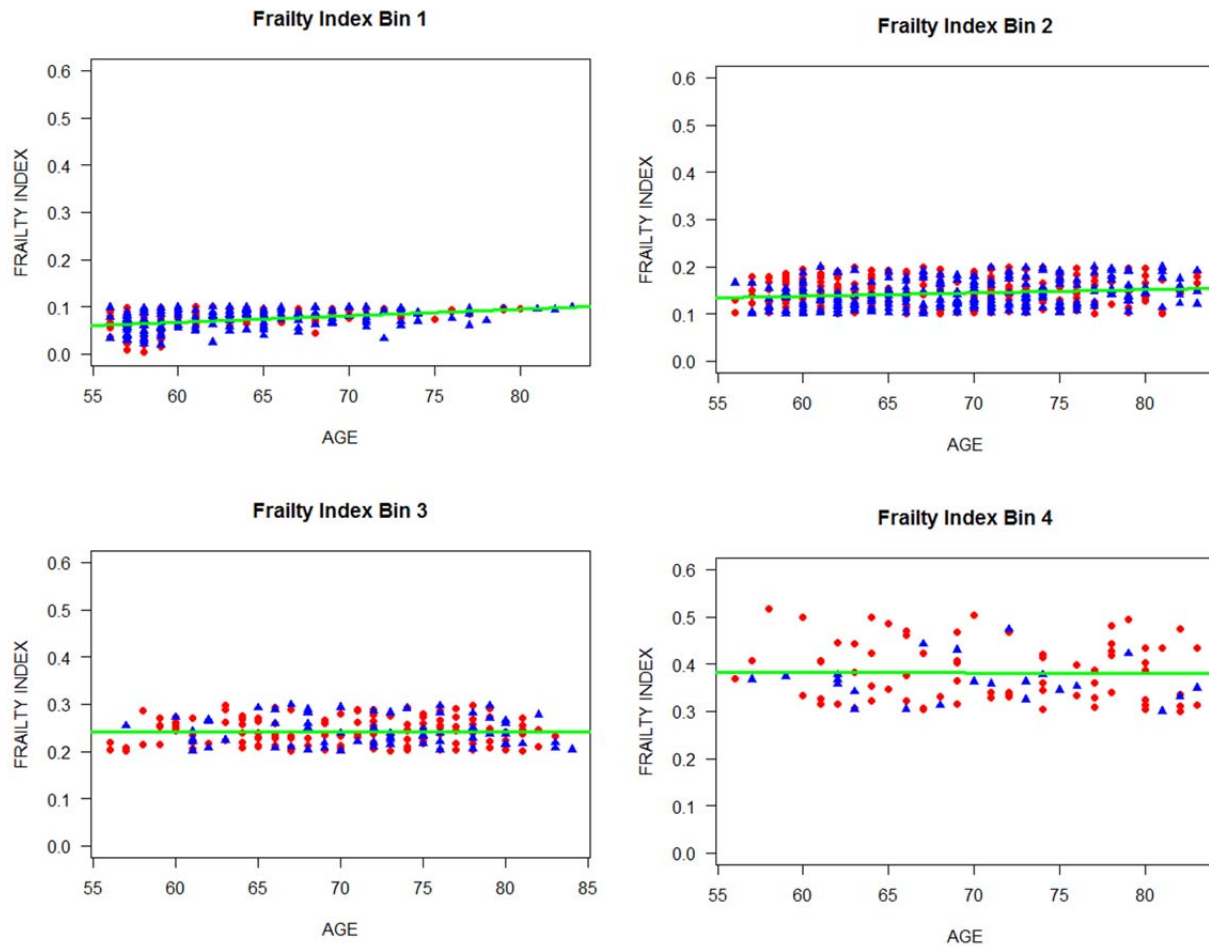

78

| Index       | Regression Equation                                    | Pearson's <i>R</i> Correlation | <i>R</i> <sup>2</sup> |
|-------------|--------------------------------------------------------|--------------------------------|-----------------------|
| <b>F1</b>   | F1 = 0.00141 (AGE) – 0.017                             | 0.4103758                      | 0.1684083             |
| <b>F2</b>   | F2 = 0.1027842 (AGE) + 0.0005897                       | 0.1386819                      | 0.01923266            |
| <b>F3</b>   | F3 = 2.366e <sup>-1</sup> (AGE) + 7.759e <sup>-5</sup> | 0.01908764                     | 0.0003643379          |
| <b>F4</b>   | F4 = 0.4242092 (AGE) -0.0006516                        | -0.07644561                    | 0.005843931           |
| <b>FULL</b> | F_Total = -0.119336 (AGE) + 0.004092                   | 0.335749                       | 0.1127274             |

79

80 **Supplementary Figure 2/** Alongside the full frailty index linear regression model with 1191 subjects (**Fig**  
81 **1a**), analyses were also carried out on data from each frail level (blue triangles = male subjects, red dots  
82 = female subjects). Regression summary table indicates the Pearson's R Correlation between frailty and  
83 age lowers as FI score increases. Source data are provided as a Source Data file.

### Frailty Index Bin 1

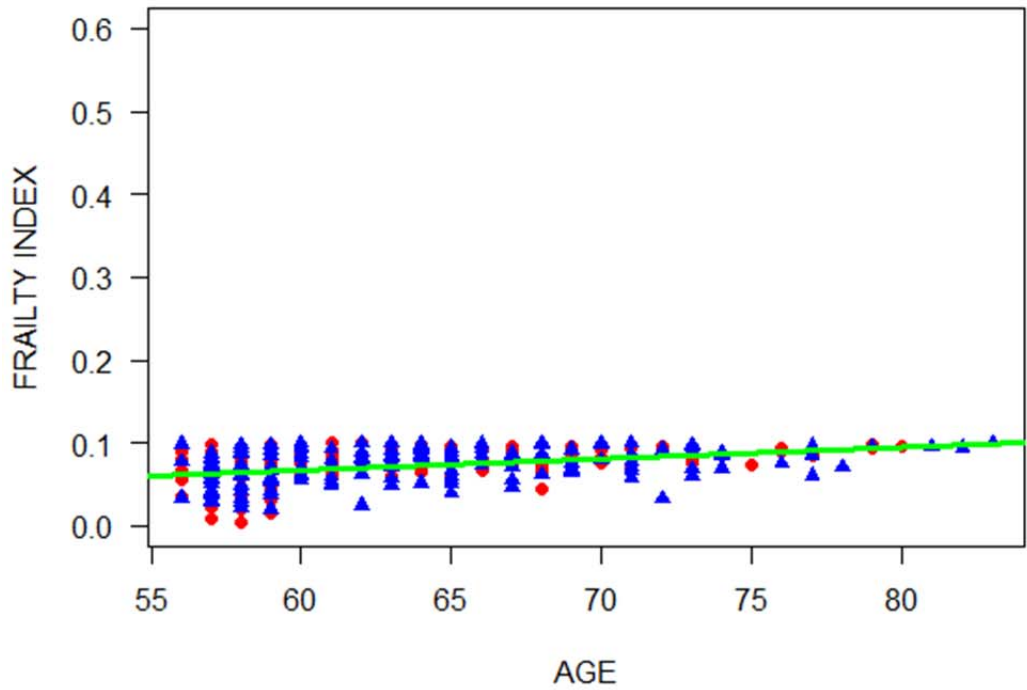

84

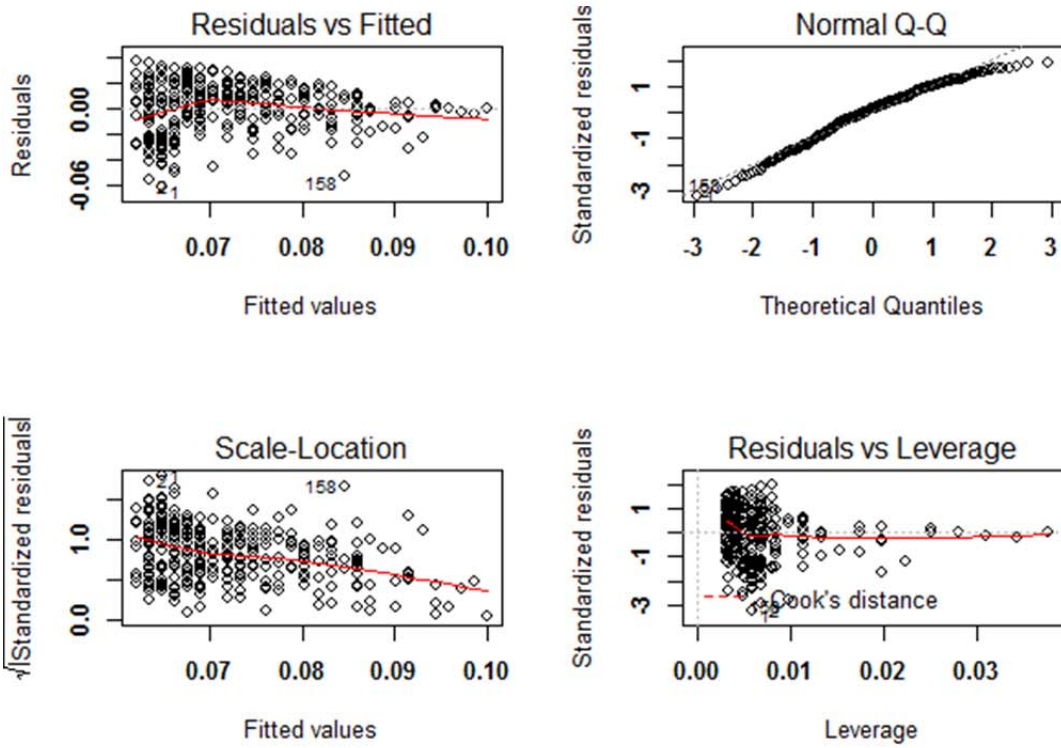

85

86 **Supplementary Figure 3|** Regression plots of Frailty Index data bin 1 (blue triangles = male subjects, red  
 87 dots = female subjects). Source data are provided as a Source Data file.

### Frailty Index Bin 2

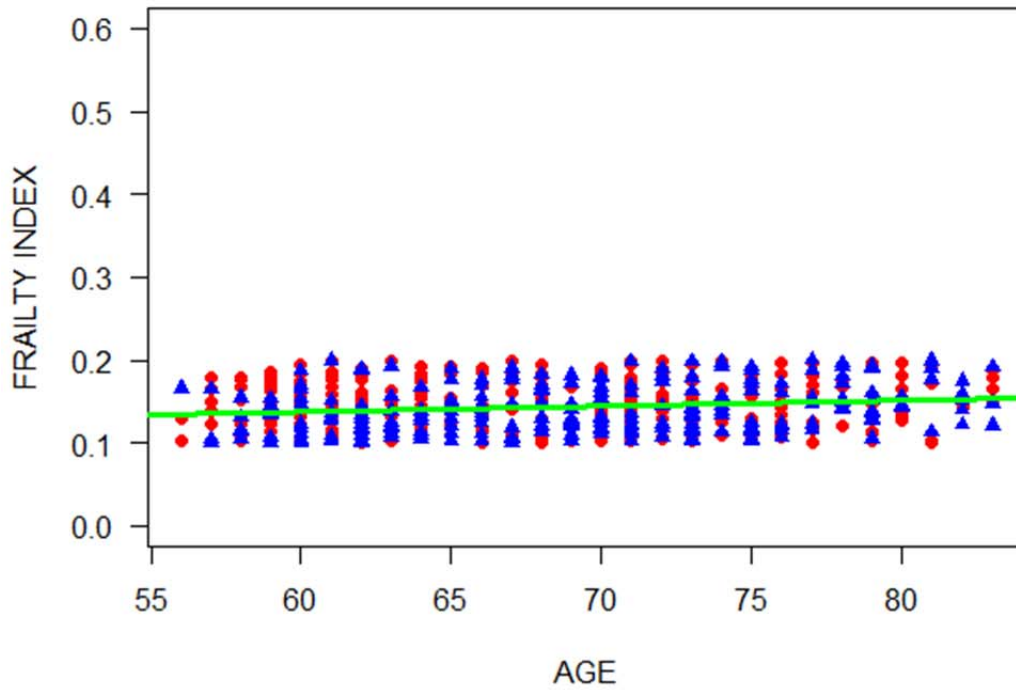

88

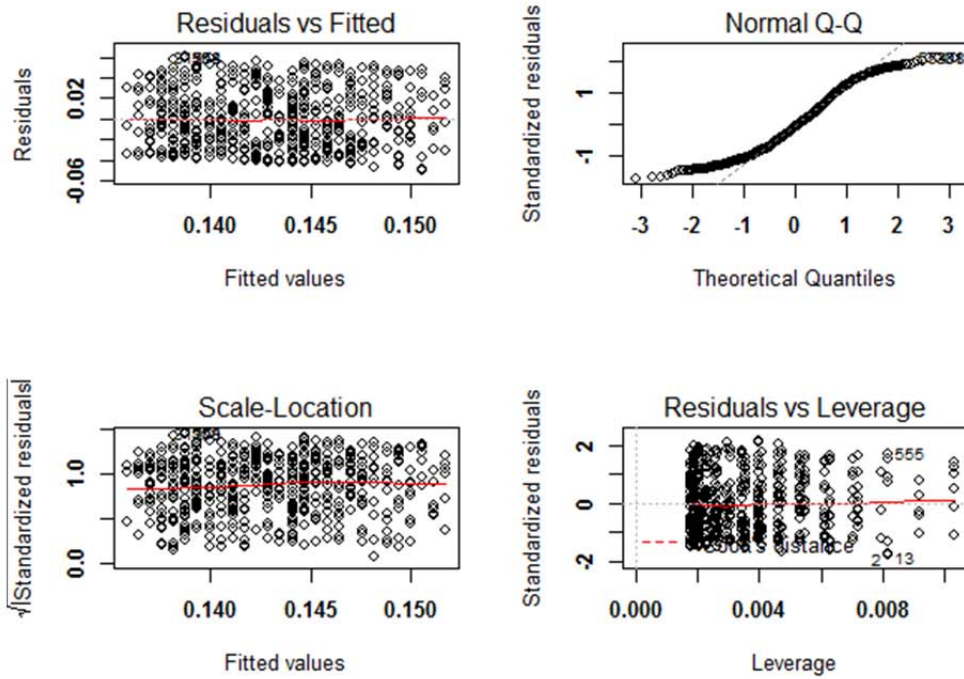

89

90

91 **Supplementary Figure 4**] Regression plots of Frailty Index data bin 2 (blue triangles = male subjects, red  
 92 dots = female subjects). Source data are provided as a Source Data file.

### Frailty Index Bin 3

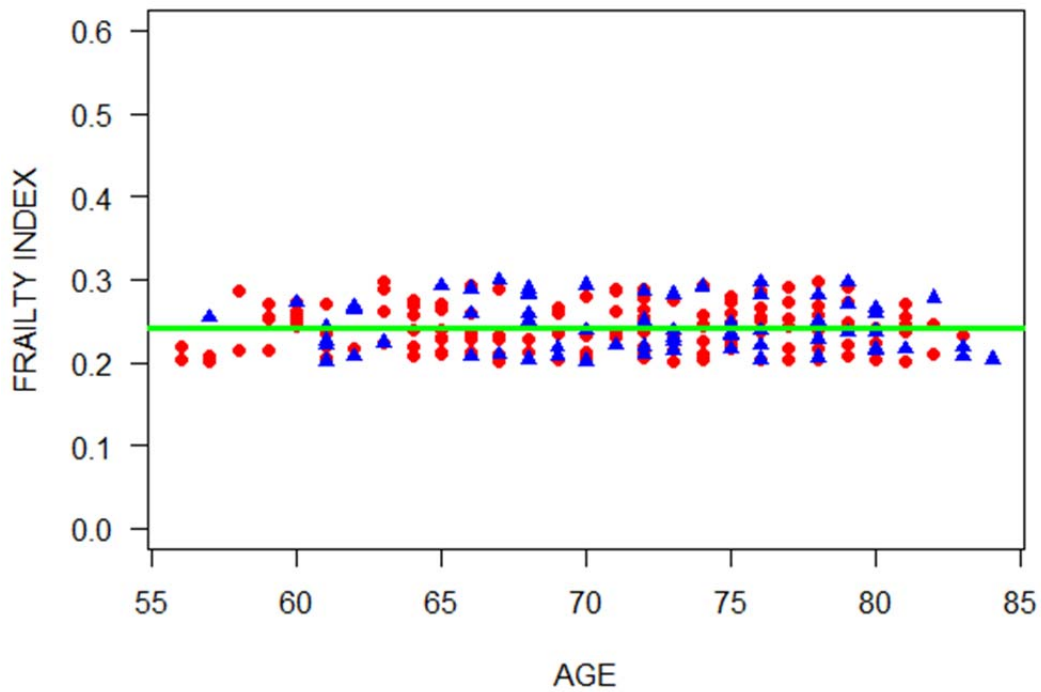

93

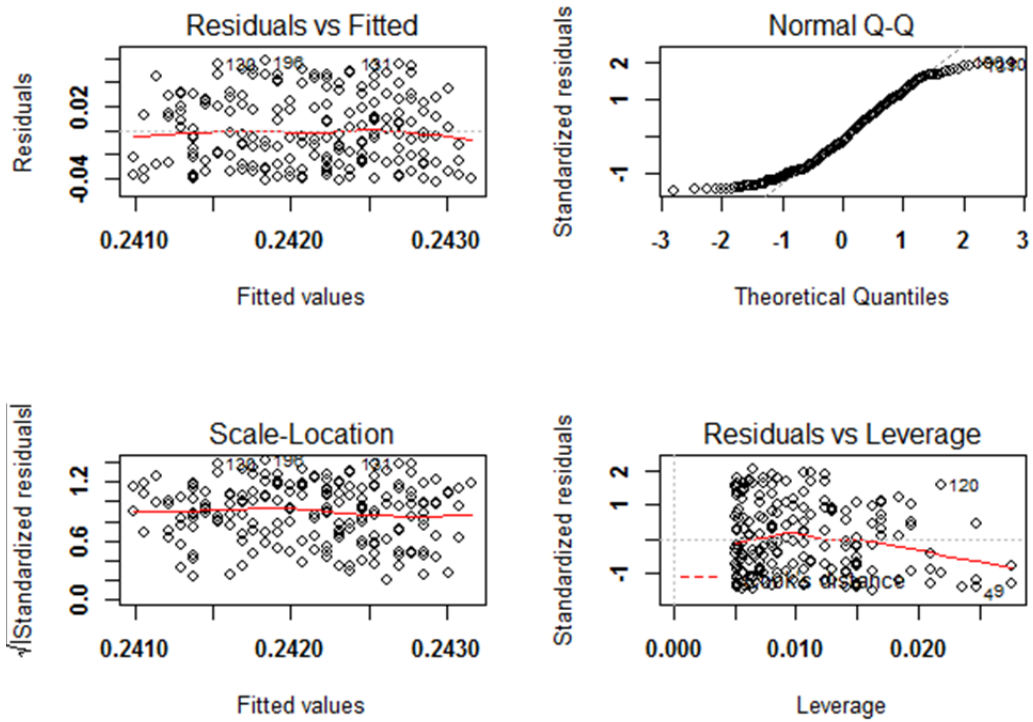

94

95 **Supplementary Figure 5]** Regression plots of Frailty Index data bin 3 (blue triangles = male subjects, red  
96 dots = female subjects). Source data are provided as a Source Data file.

97



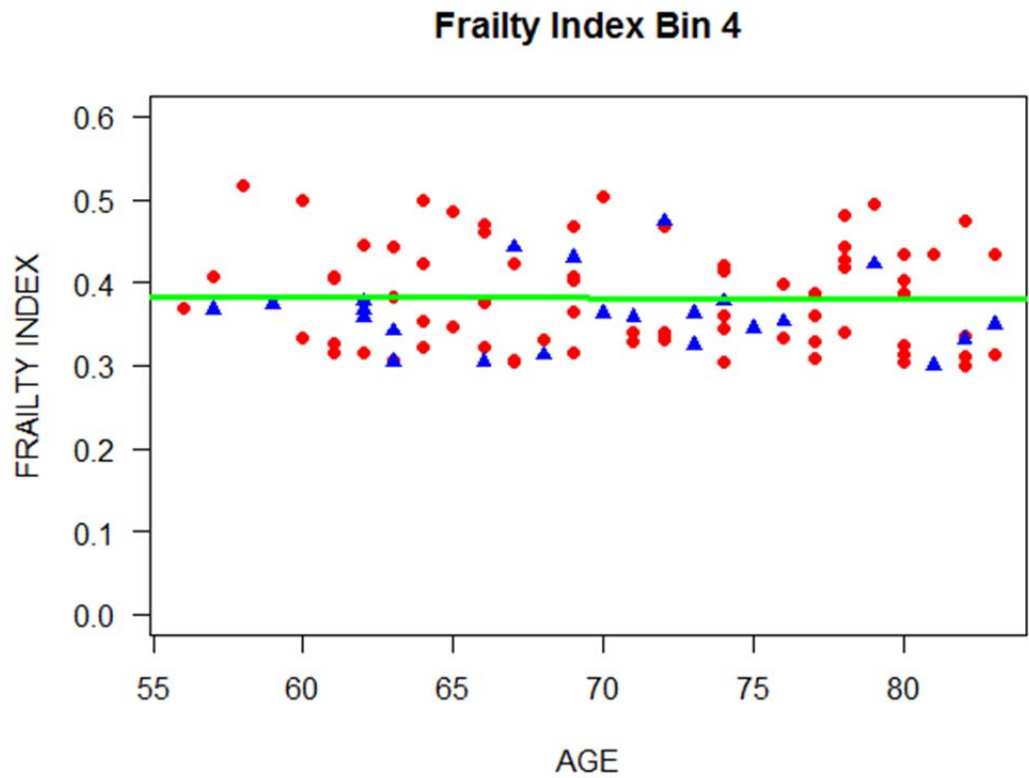

98

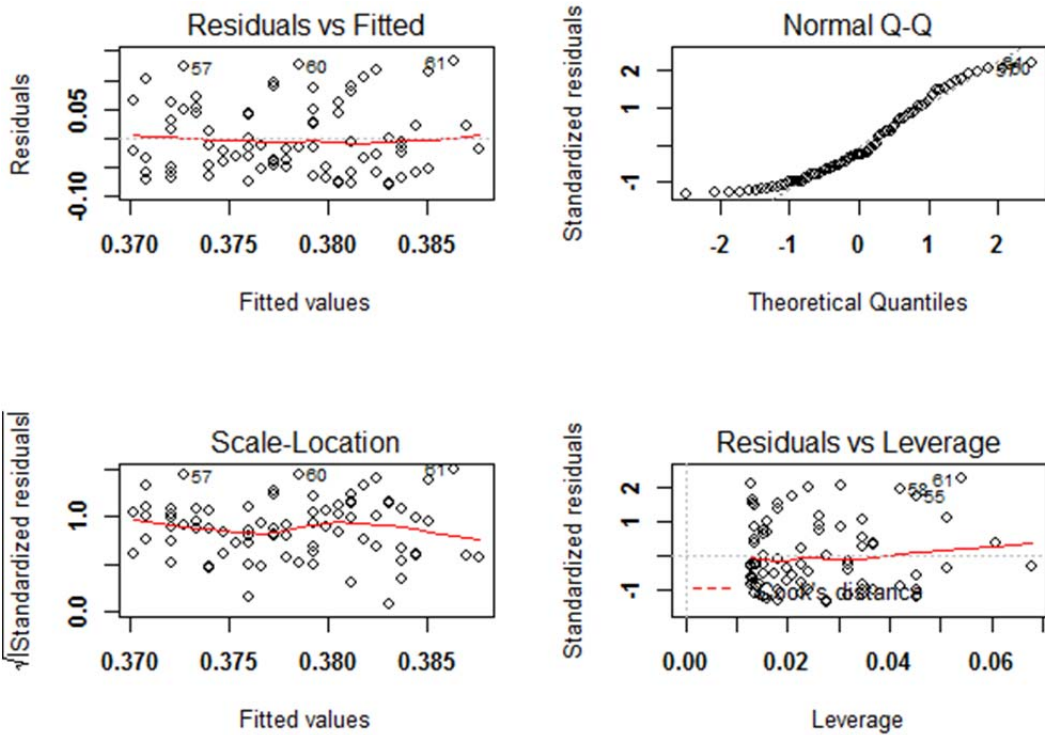

99

100 **Supplementary Figure 6]** Regression plots of Frailty Index data bin 4 (blue triangles = male subjects, red  
 101 dots = female subjects). Source data are provided as a Source Data file.

### Age Vs. Frailty Index

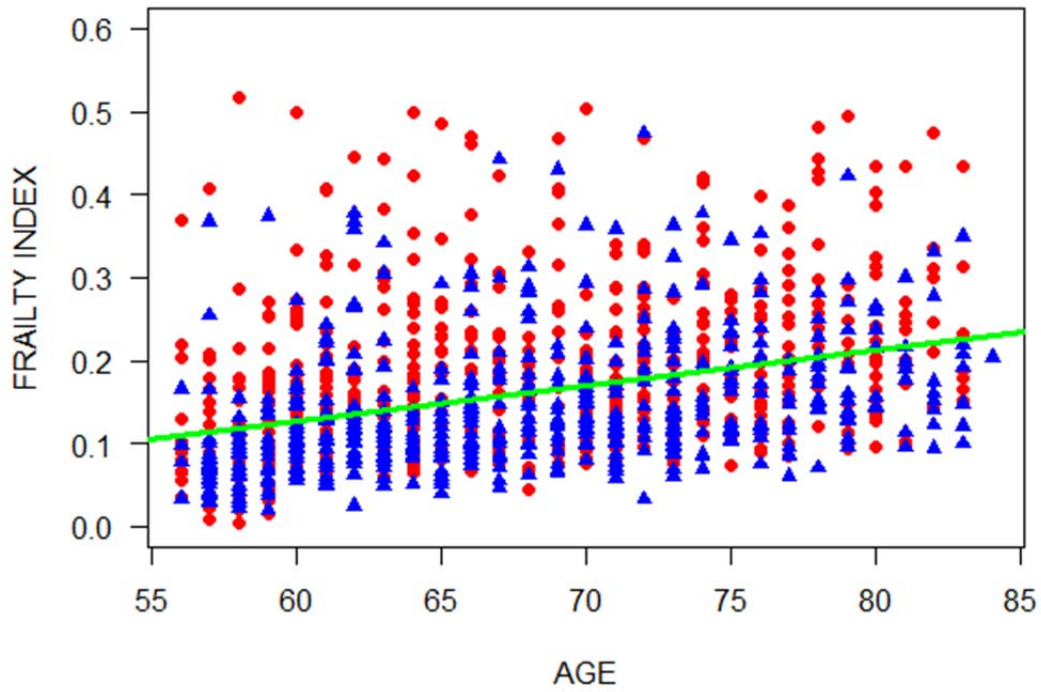

102

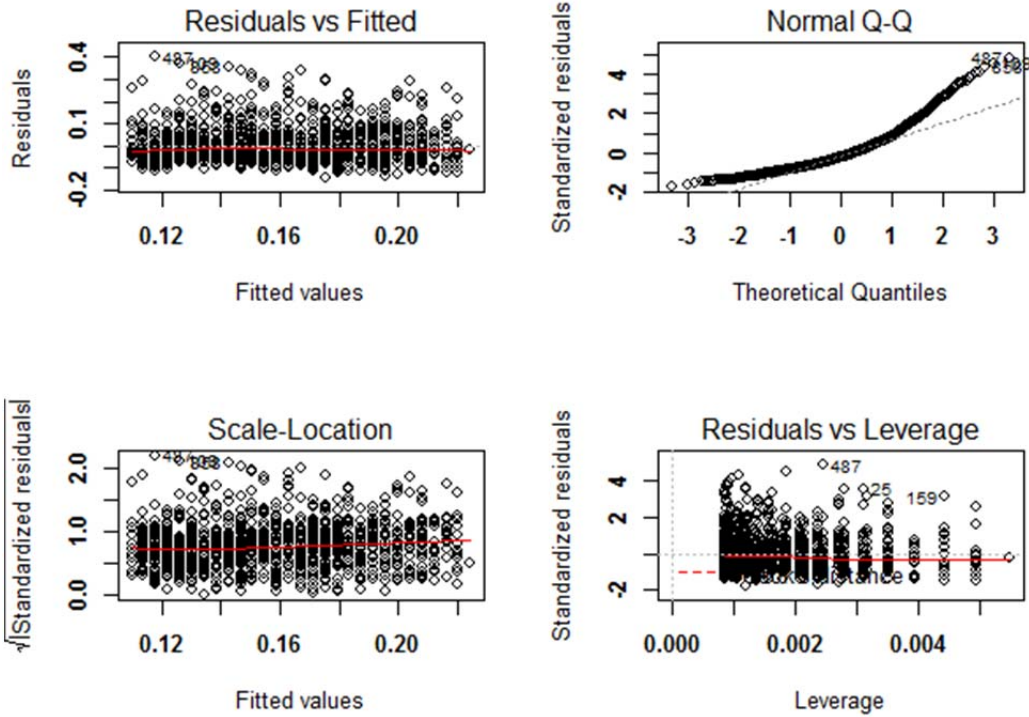

103

104 **Supplementary Figure 7** | Regression plots of All Frailty Index data bins combined (blue triangles = male  
105 subjects, red dots = female subjects). Source data are provided as a Source Data file.

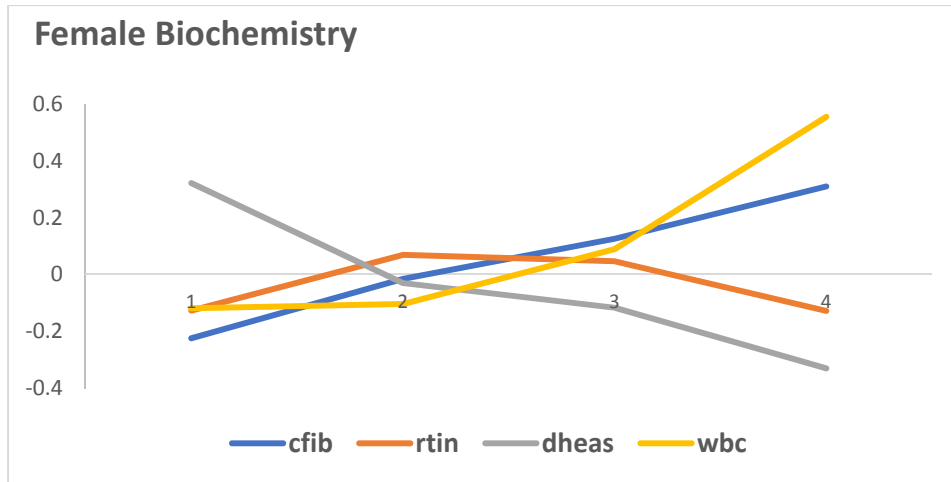

106

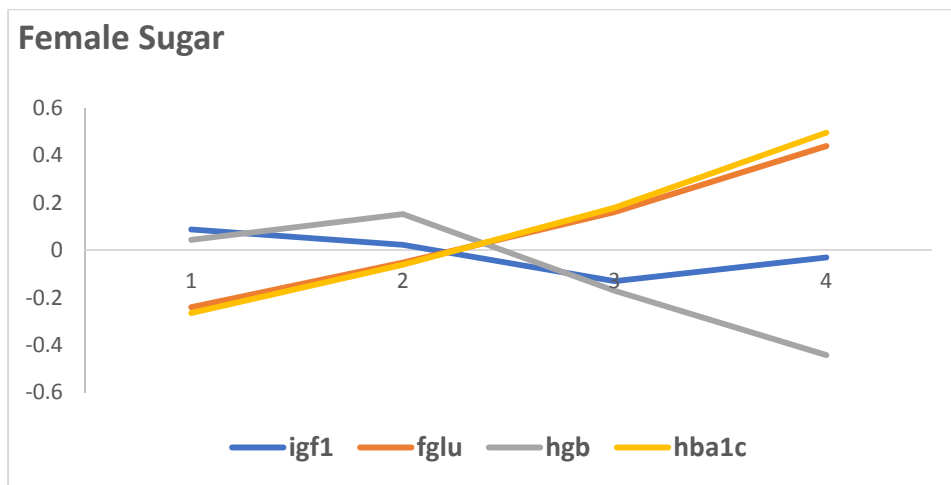

107

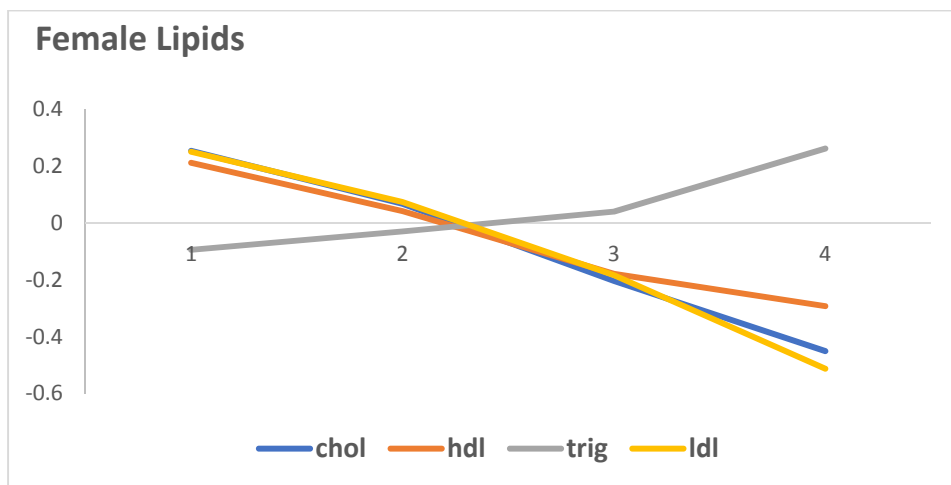

108

109 **Supplementary Figure 8|** Female sex stratification of biochemistry, carbohydrate and lipid z-score data  
 110 vs. frail index. Source data are provided as a Source Data file.

111

112

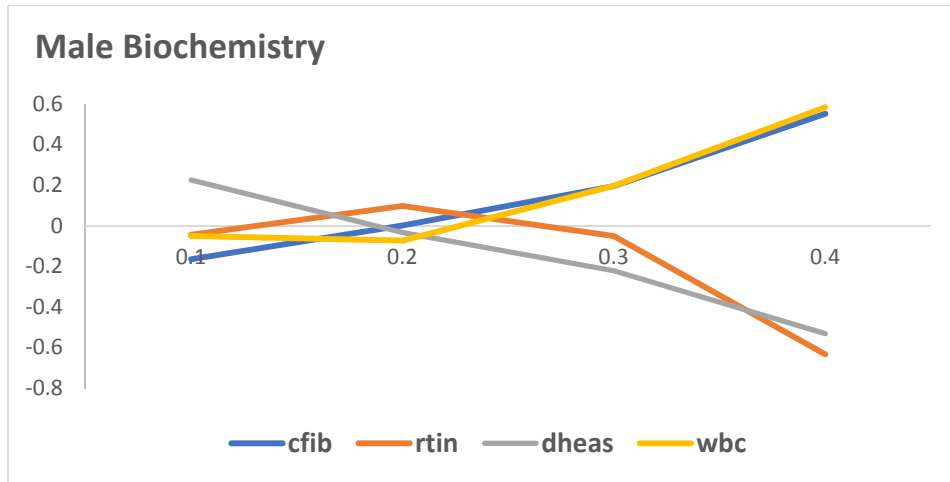

113

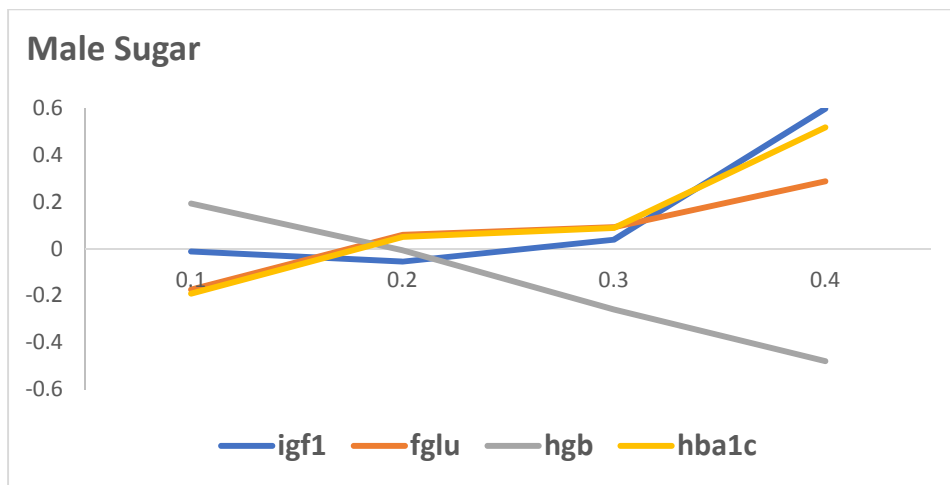

114

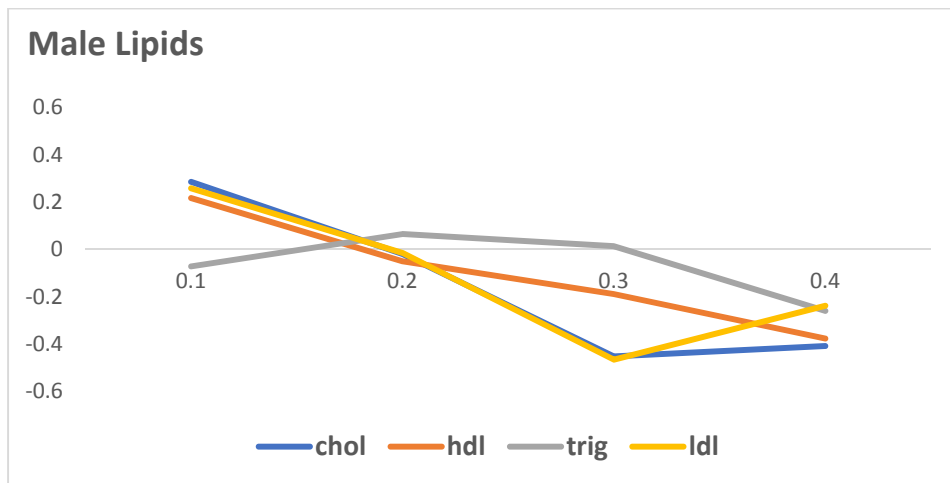

115

116

117 **Supplementary Figure 9]** Male Sex stratification of biochemistry, carbohydrate and lipid z-score data vs.  
 118 frail index bin. Source data are provided as a Source Data file.

119

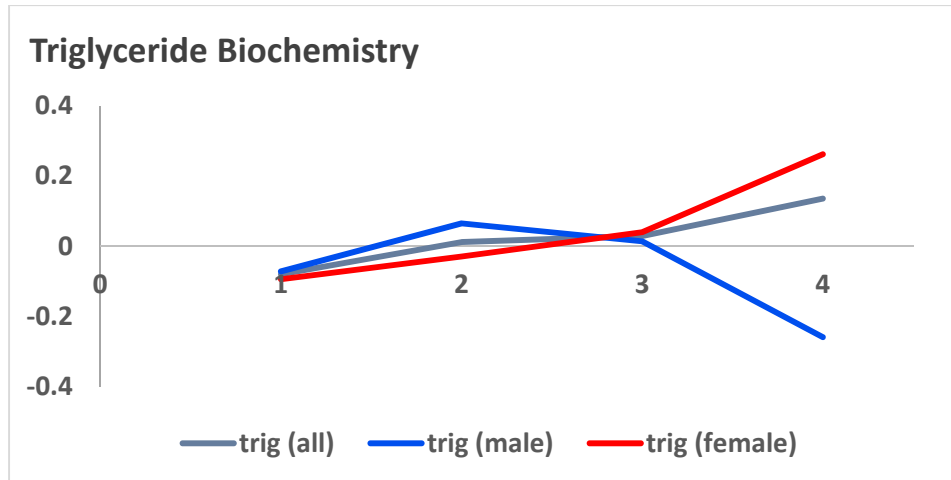

120

121

122 **Supplementary Figure 10** Sex stratification of triglyceride z-score data vs. frail index bin. It is noted that  
123 there is divergence of triglyceride levels upon comparison at higher frailty index values. Source data are  
124 provided as a Source Data file.

125

126

127

128

129

130

131

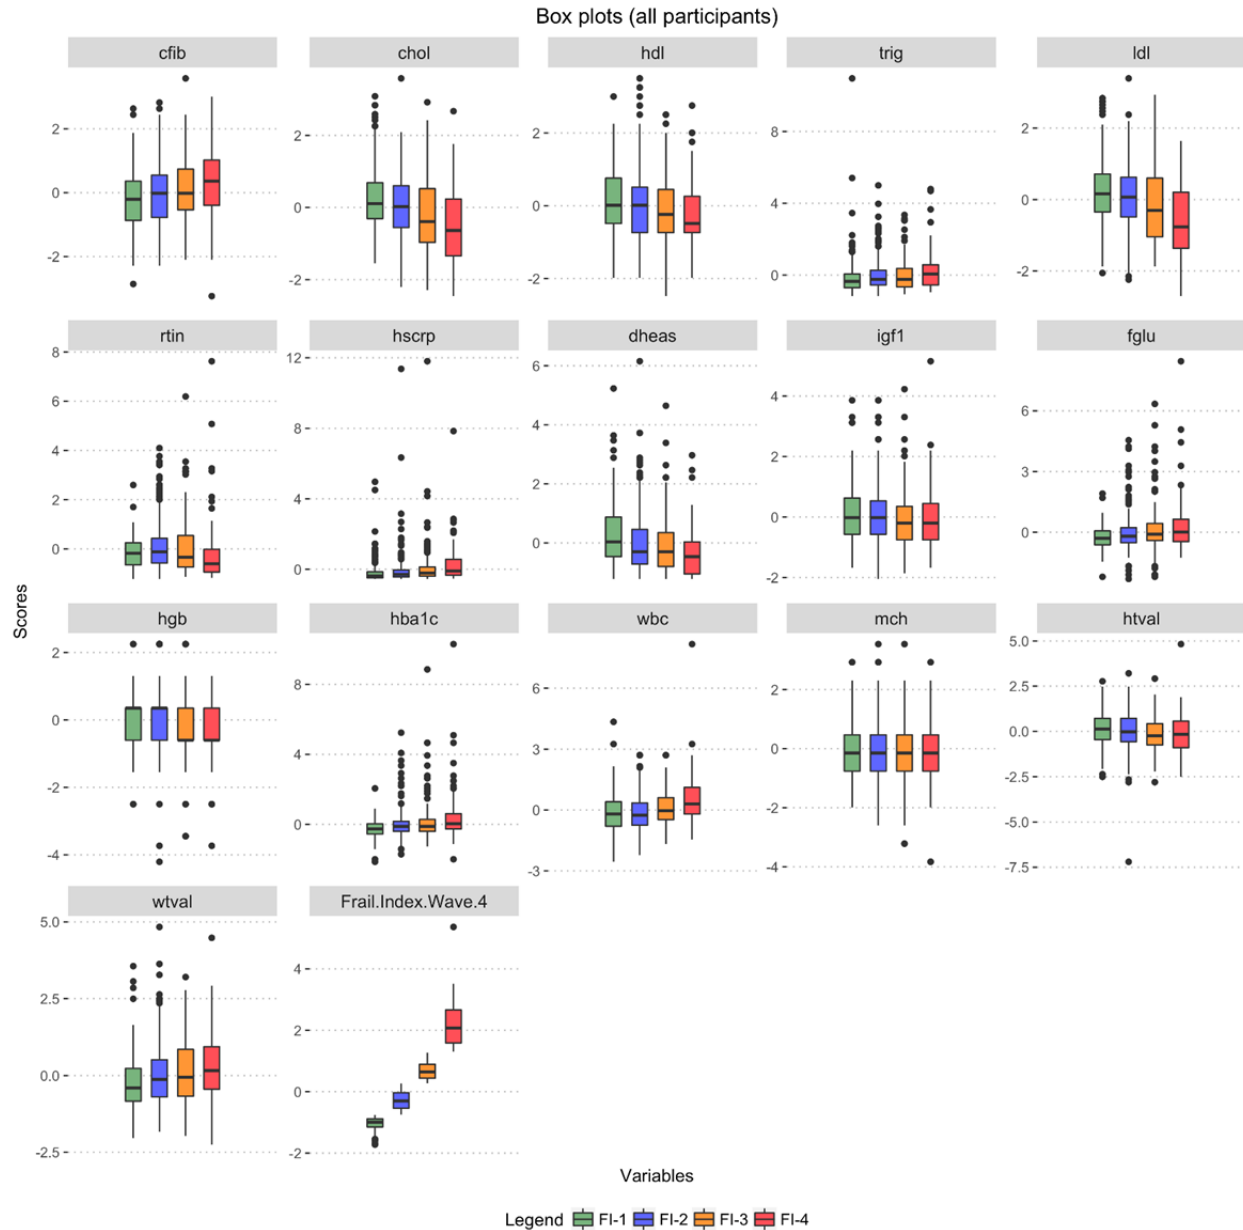

132

133 **Supplementary Appendix 11|** Boxplots of all Wave 4 biochemistry measurements measured against  
 134 frailty index bin. Each boxplot displays median value (center line), upper and lower quartiles (box limits)  
 135 and points out of interquartile range are outliers. Green Boxplot = Frailty Index 0 – 0.1, Blue Boxplot =  
 136 Frailty Index 0.1 – 0.2, Orange Boxplot = Frailty Index 0.2 – 0.3, Red Boxplot = Frailty Index 0.3 and  
 137 above. Source data are provided as a Source Data file.

138

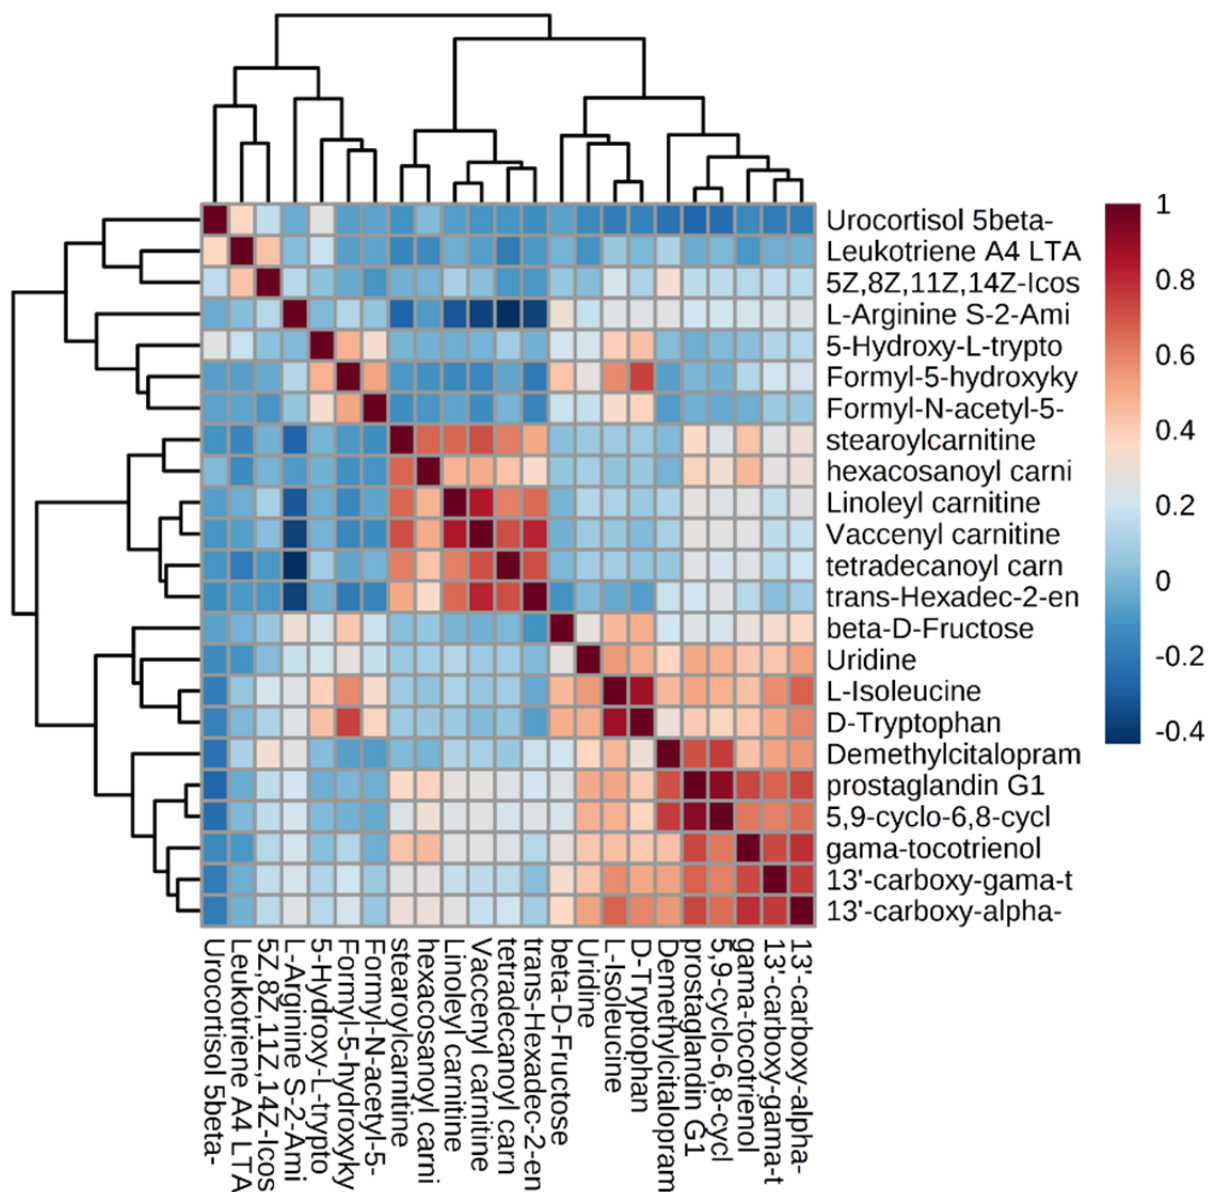

139  
 140 **Supplementary Figure 12** Heat map of significant LCMS metabolites indicating the correlation between  
 141 metabolites of similar classes linked to the up regulated pathways (Red colors indicate a higher  
 142 correlation). Source data are provided as a Source Data file  
 143



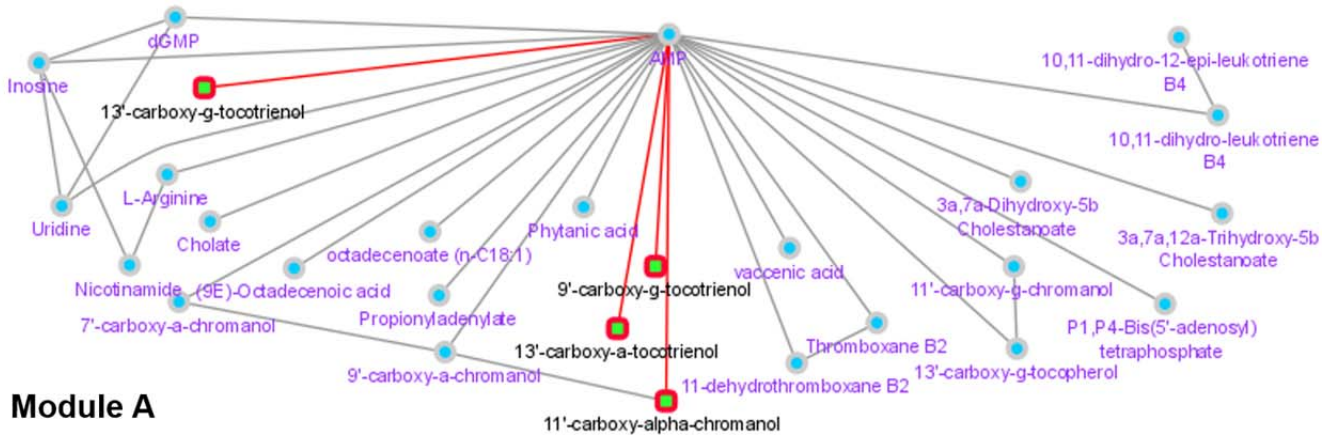

**Module A**

**Module B**

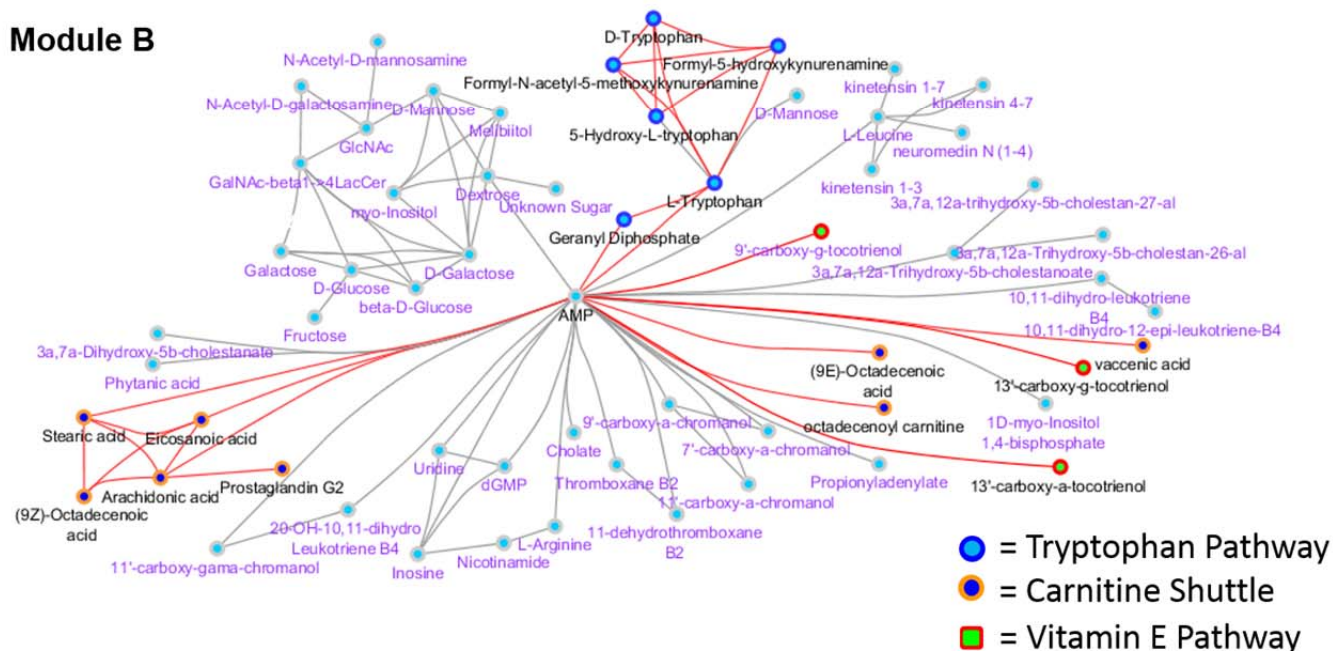

● = Tryptophan Pathway  
● = Carnitine Shuttle  
■ = Vitamin E Pathway

144 **Supplementary Figure 13** Contributory metabolite modules identified in mummichog analysis  
 145 highlighting three main pathways based on LCMS metabolite data. Module A highlights connectivity within  
 146 the vitamin E pathway. Module B highlights connectivity with the tryptophan and carnitine shuttle  
 147 pathways. Source data are provided as a Source Data file.

148

149



### Multidimension scaling analysis on meta data

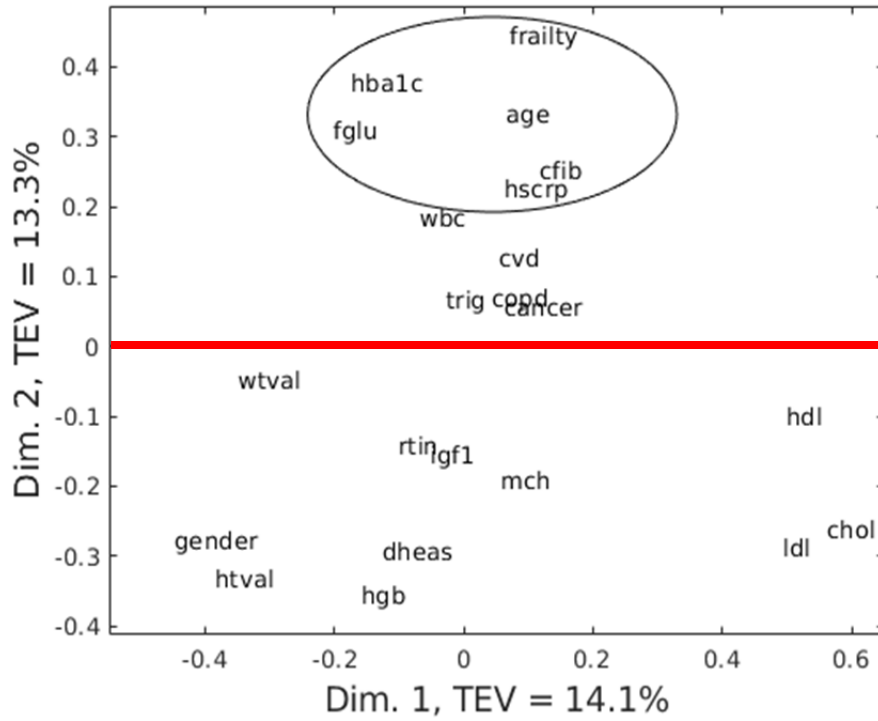

150

151

152 **Supplementary Figure 14** Multidimensional Scaling Analysis used to measure the level of correlated  
153 (+ve value), or anti-correlated (-ve value) confounding factors related to frailty score (using 1 – Spearman  
154 Rho as the distance metric). Source data are provided as a Source Data file.

155

156

157

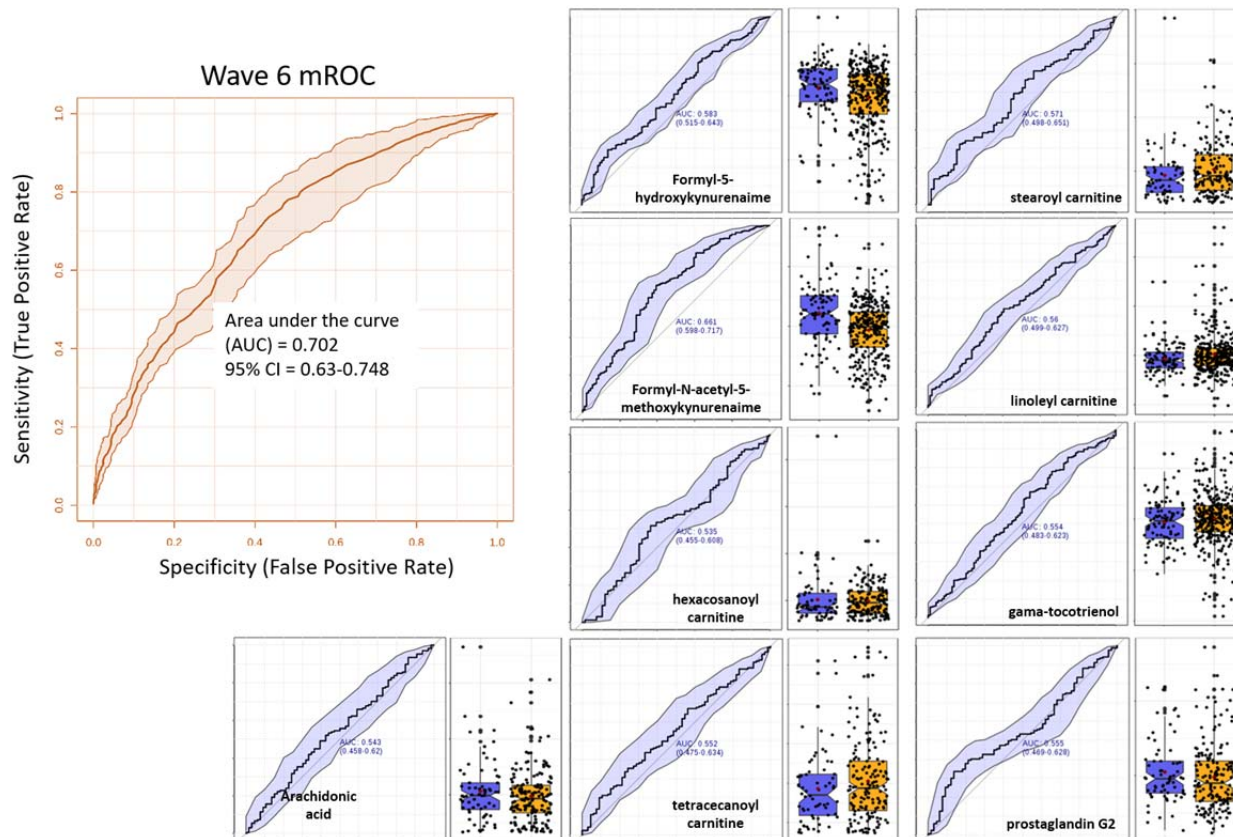

158

159 **Supplementary Figure 15]** Significance and diagnostic ability within the metabolic model of frailty.  
 160 mROC curve from Waves 6 generated by combining 9 of the same significant metabolites detected in  
 161 Wave 4 to generate a diagnostic model of frailty status. The shaded area indicate 95% confidence  
 162 intervals calculated by Monte Carlo cross validation using balanced subsampling and 1000 iterations of  
 163 bootstrapped cross-validation. Univariate ROC curves and non-frail (orange) to frail (blue) boxplots of  
 164 each metabolite were used to generate the multivariate ROC analysis. Source data are provided as a  
 165 Source Data file.

166

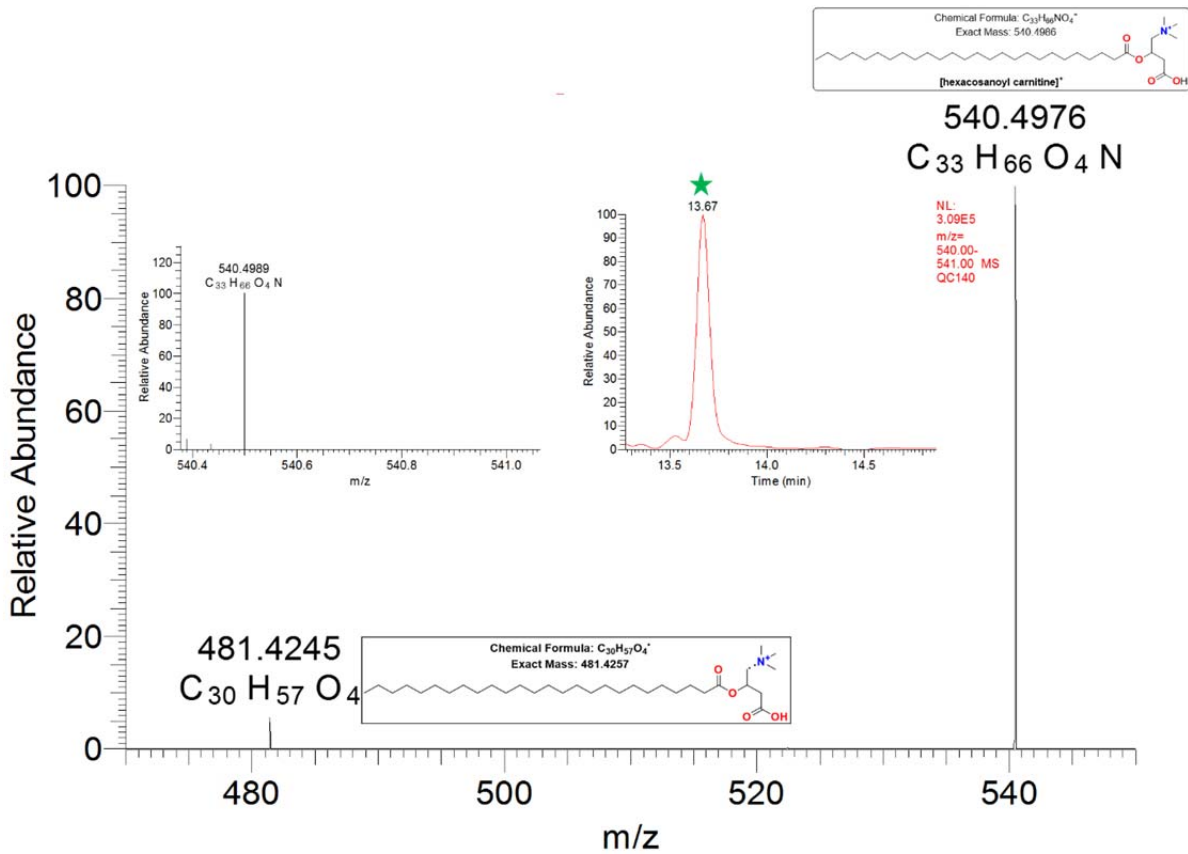

167

168 **Supplementary Figure 16** Accurate mass and MSMS data on hexacosoyl-carnitine. Source data are  
 169 provided within the data. Raw data used to generate spectra within this image are available within the  
 170 associated MetaboLights Study upload (MTBLS598).  
 171

171

172

173

174

175

176

177

178

179

180

181

182

183

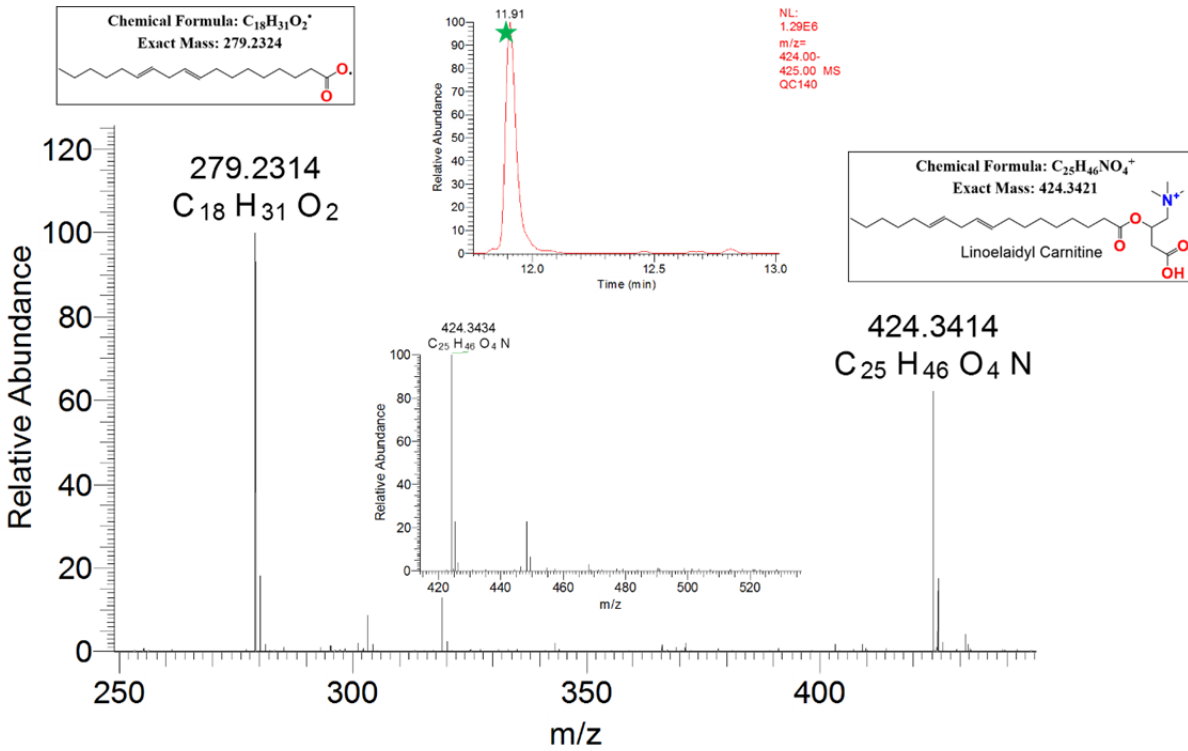

184  
185  
186  
187

**Supplementary Figure 17** Accurate mass and MSMS data on linoleyl carnitine. Raw data used to generate spectra within this image are available within the associated MetaboLights Study upload (MTBLS598).

188  
189  
190  
191  
192  
193  
194  
195  
196  
197  
198  
199  
200  
201  
202  
203

204

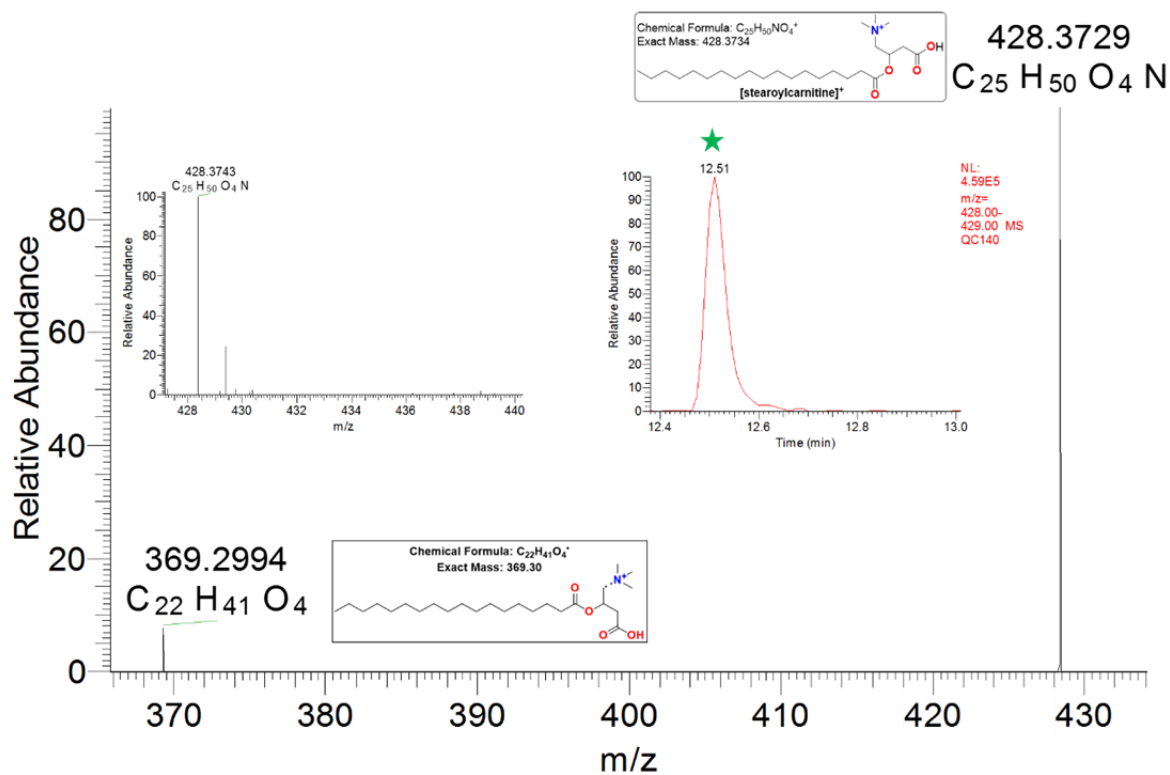

205

206 **Supplementary Figure 18** Accurate mass and MSMS data on steroyl carnitine. Raw data used to  
207 generate spectra within this image are available within the associated MetaboLights Study upload  
208 (MTBLS598).

209

210

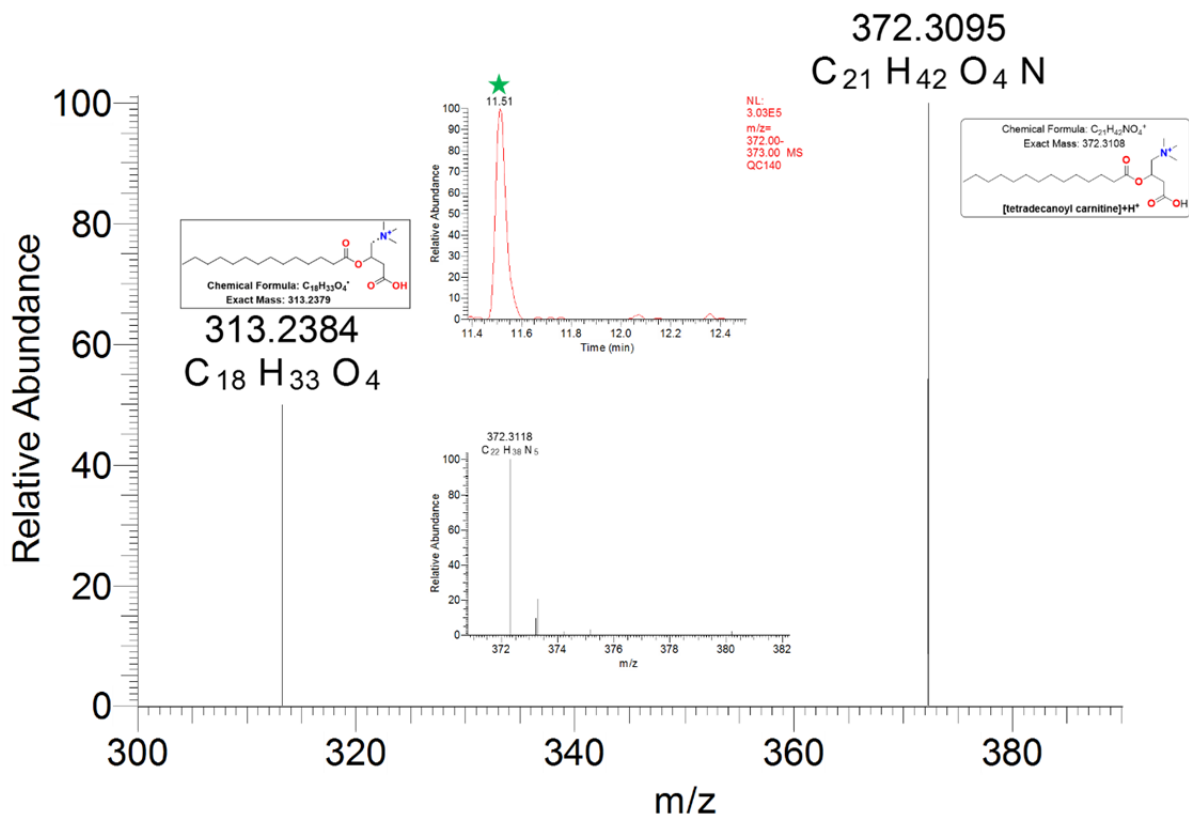

211

212 **Supplementary Figure 19** | Accurate mass and MSMS data on tetradecanoyl carnitine. Raw data used to  
 213 generate spectra within this image are available within the associated MetaboLights Study upload  
 214 (MTBLS598).

215

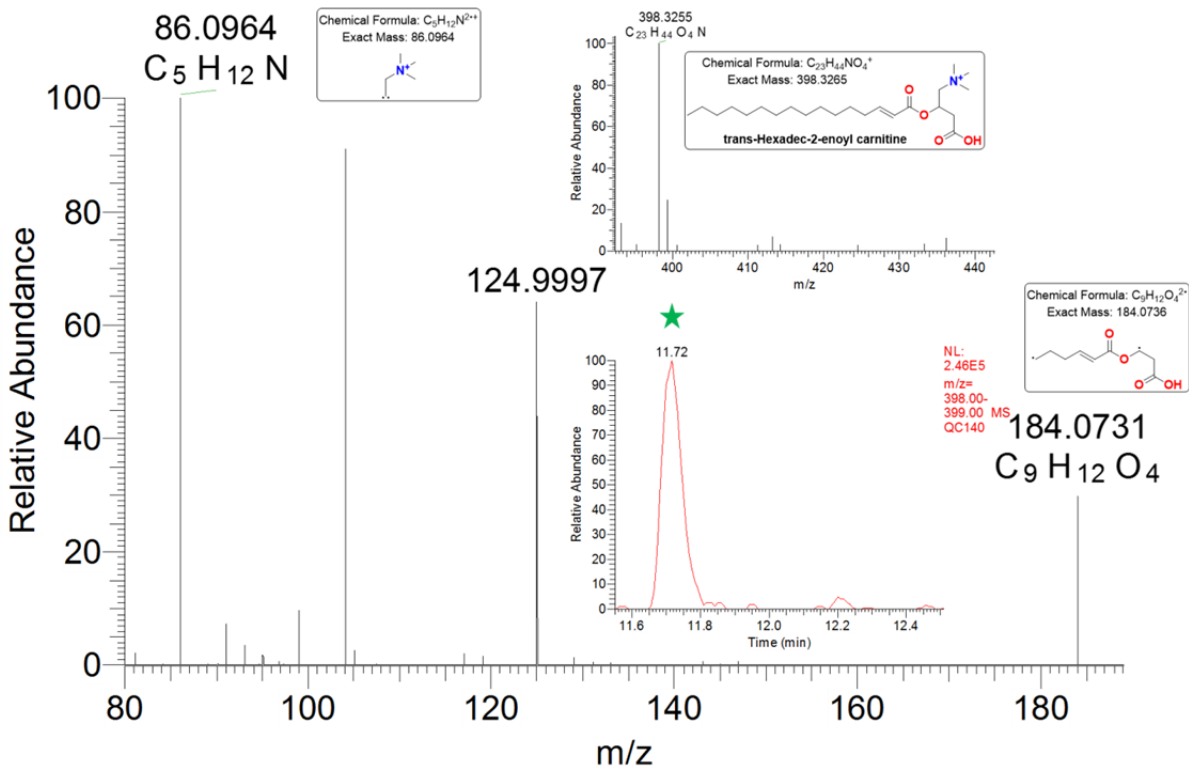

216

217 **Supplementary Figure 20** Accurate mass and MSMS data on trans-hexadec-2-enoyl carnitine. Raw  
 218 data used to generate spectra within this image are available within the associated MetaboLights Study  
 219 upload (MTBLS598).

220

221

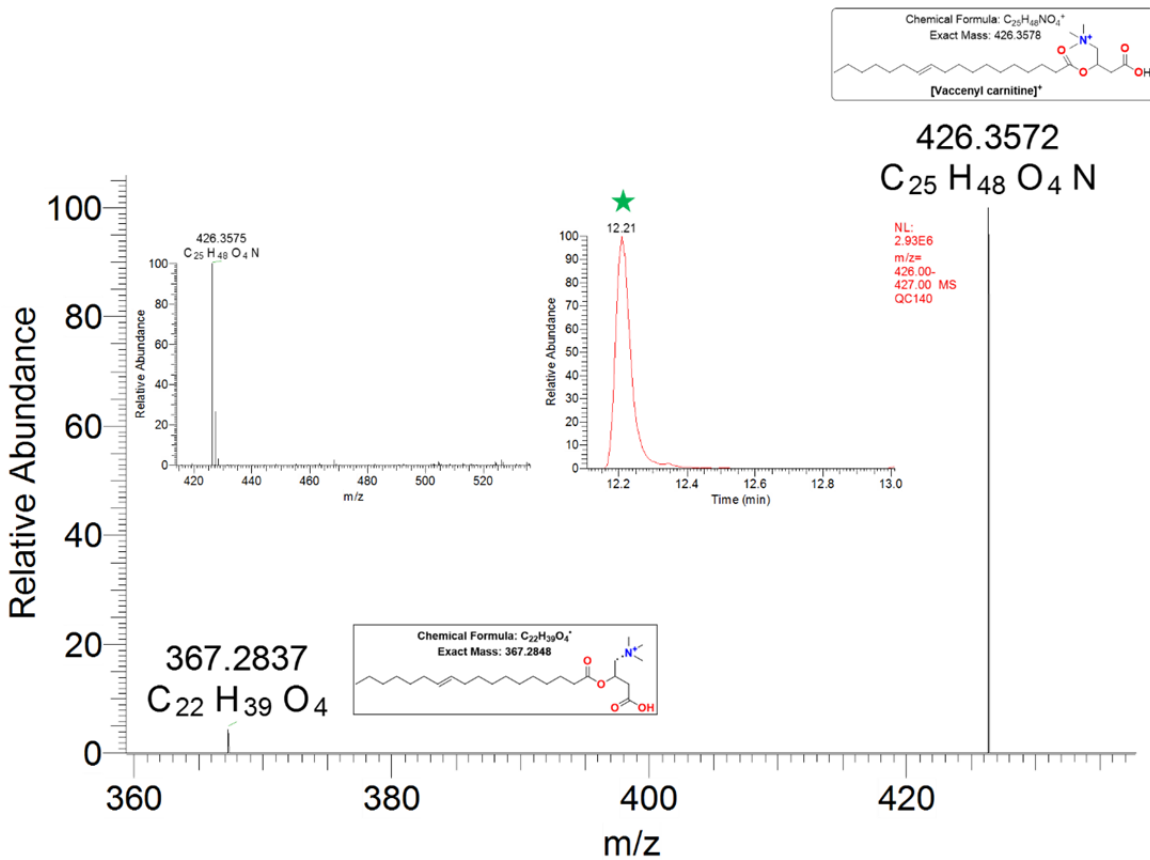

222

223 **Supplementary Figure 21** | Accurate mass and MSMS data on vaccenyl carnitine. Raw data used to  
 224 generate spectra within this image are available within the associated MetaboLights Study upload  
 225 (MTBLS598).

226



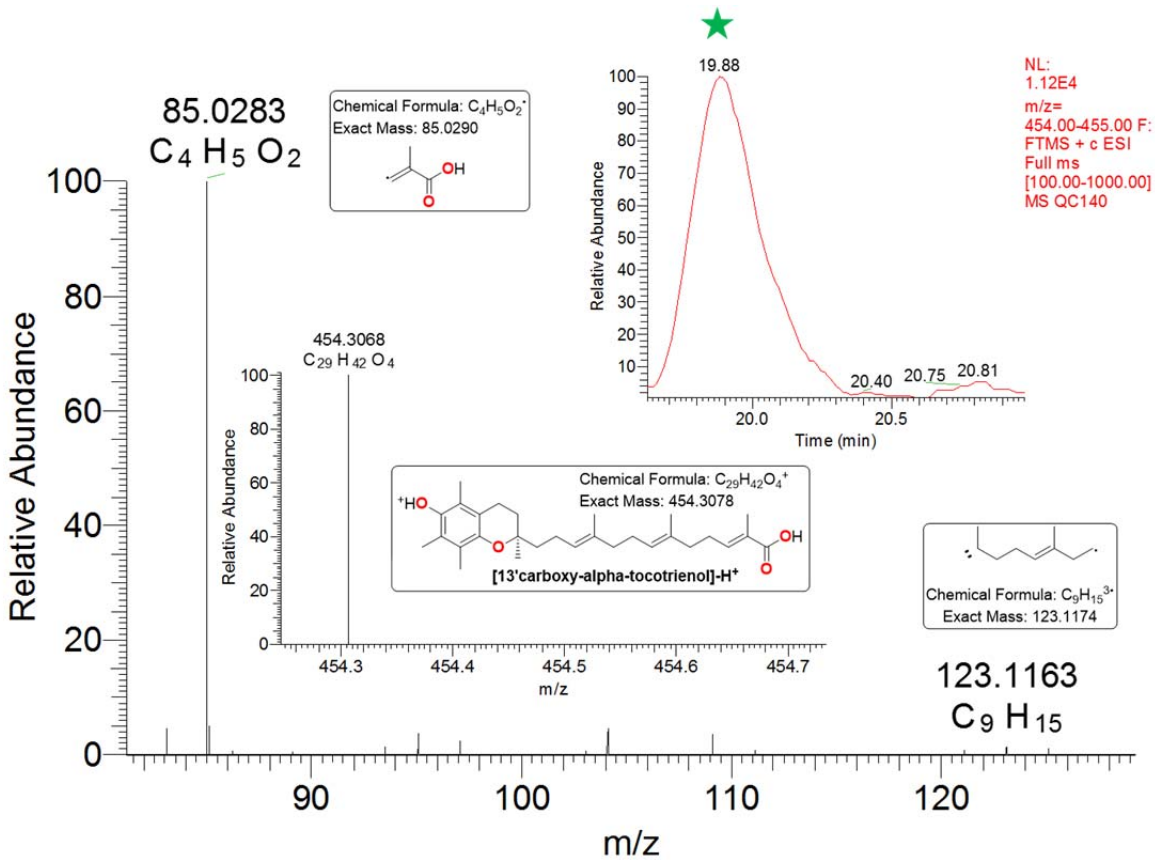

227

228 **Supplementary Figure 22** Accurate mass and MSMS data on 13'-carboxy-alpha-tocotrienol. Raw data  
 229 used to generate spectra within this image are available within the associated MetaboLights Study upload  
 230 (MTBLS598).

231

232

233

234

235

236

237

238

239

240

241

242

243

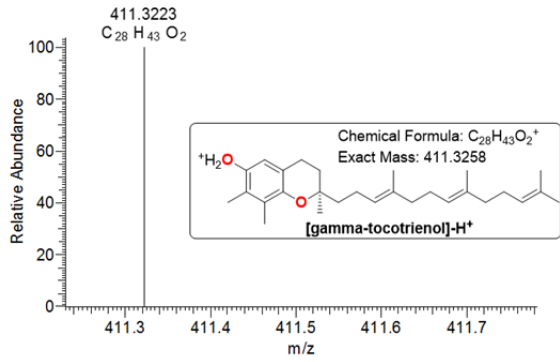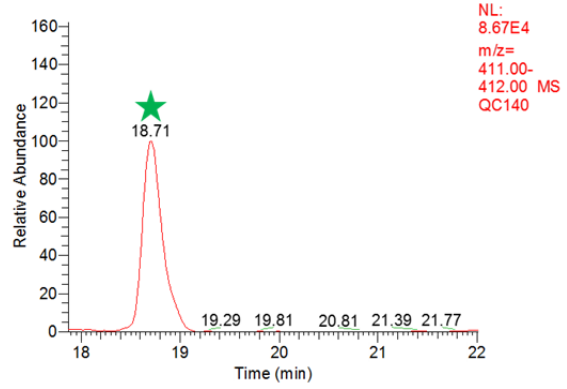

244

245 **Supplementary Figure 23** Accurate mass data on gamma-tocotrienol. Raw data used to generate  
246 spectra within this image are available within the associated MetaboLights Study upload (MTBLS598).

247

248

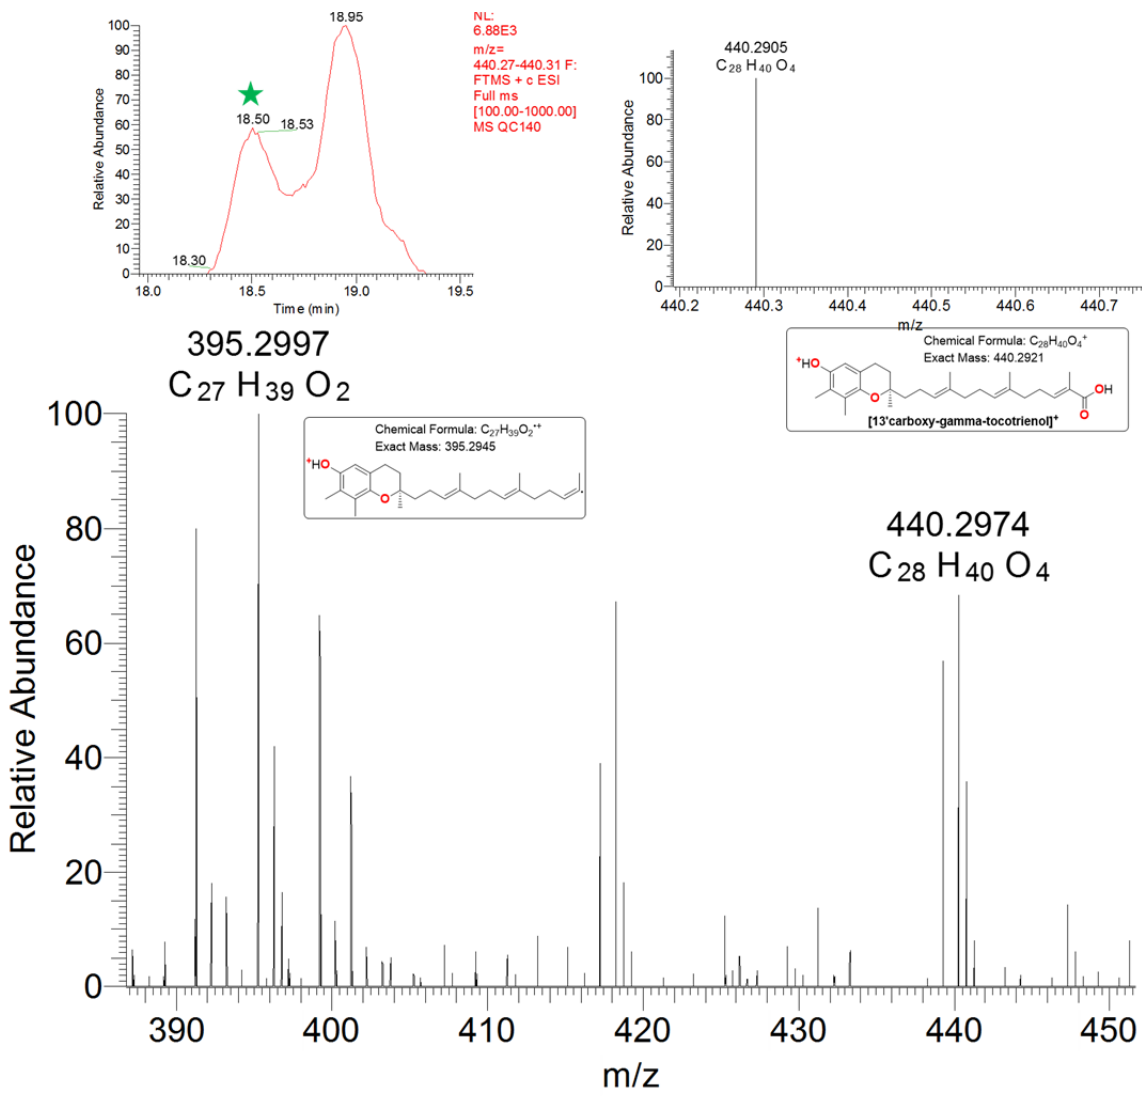

249

250 **Supplementary Figure 24** Accurate mass and MSMS data on 13'-carboxy-gamma-tocotrienol. Raw data  
 251 used to generate spectra within this image are available within the associated MetaboLights Study upload  
 252 (MTBLS598).

253

254

255

256

257

258

259

260

261

262

263

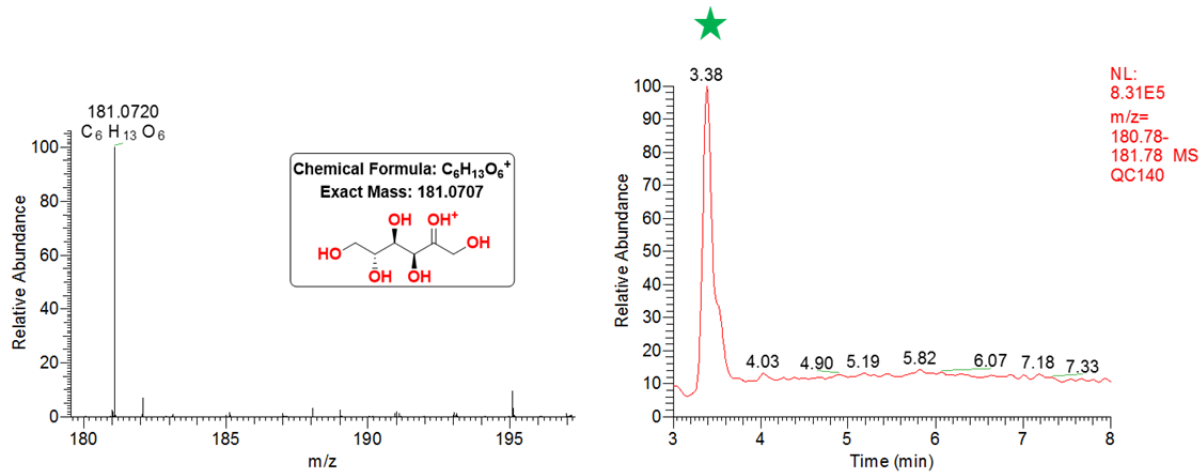

264

265 **Supplementary Figure 25]** Accurate mass data on fructose. Raw data used to generate spectra within  
266 this image are available within the associated MetaboLights Study upload (MTBLS598).

267

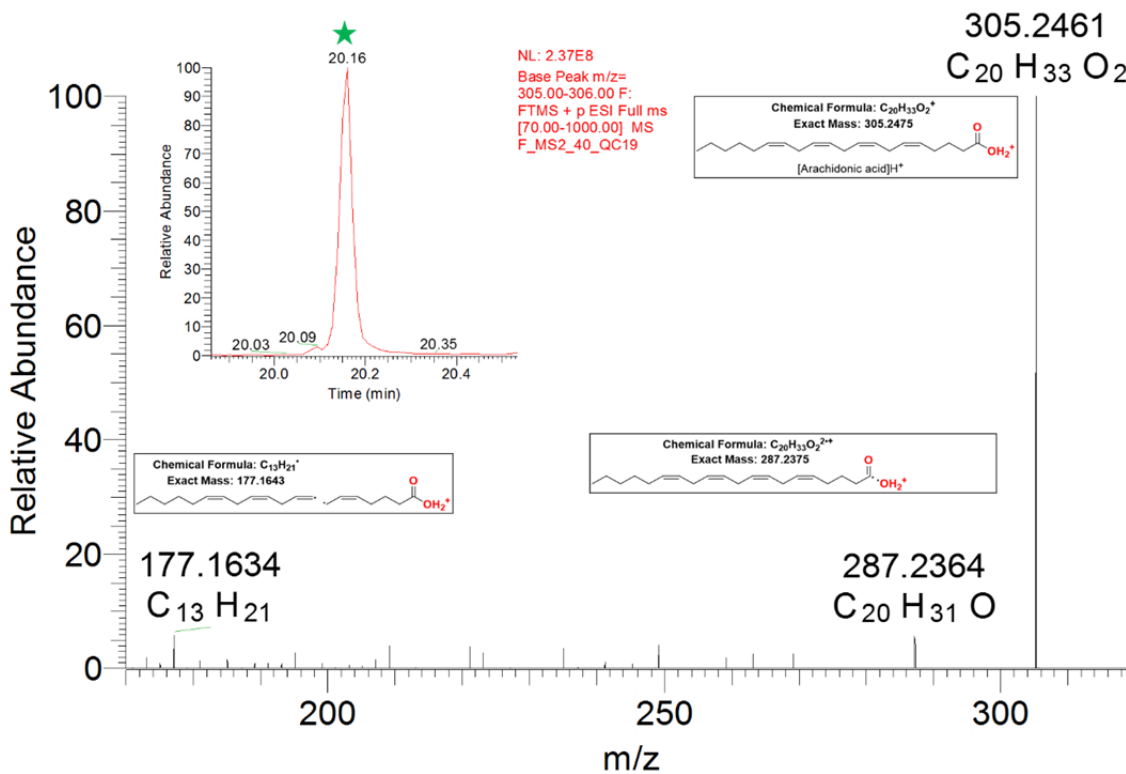

268  
 269 **Supplementary Figure 26** Accurate mass and MSMS data on arachidonic acid. Raw data used to  
 270 generate spectra within this image are available within the associated MetaboLights Study upload  
 271 (MTBLS598).

272  
 273  
 274  
 275  
 276  
 277  
 278  
 279  
 280  
 281  
 282  
 283  
 284  
 285  
 286

287

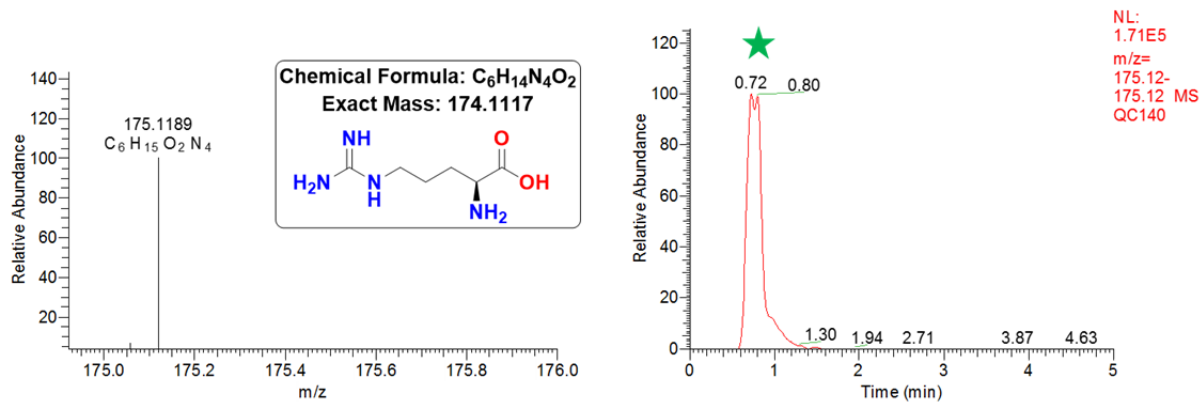

288

289 **Supplementary Figure 27** Accurate mass data on L-arginine. Raw data used to generate spectra within  
290 this image are available within the associated MetaboLights Study upload (MTBLS598).

291

292

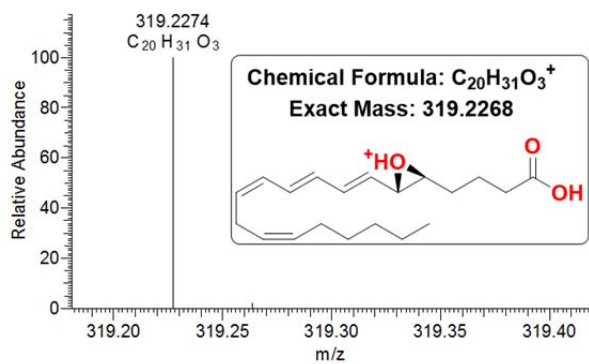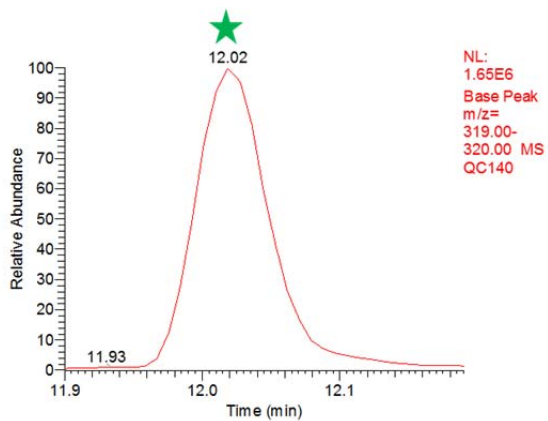

293

294 **Supplementary Figure 28|** Accurate mass data on leukotriene A4. Raw data used to generate spectra  
 295 within this image are available within the associated MetaboLights Study upload (MTBLS598).

296

297

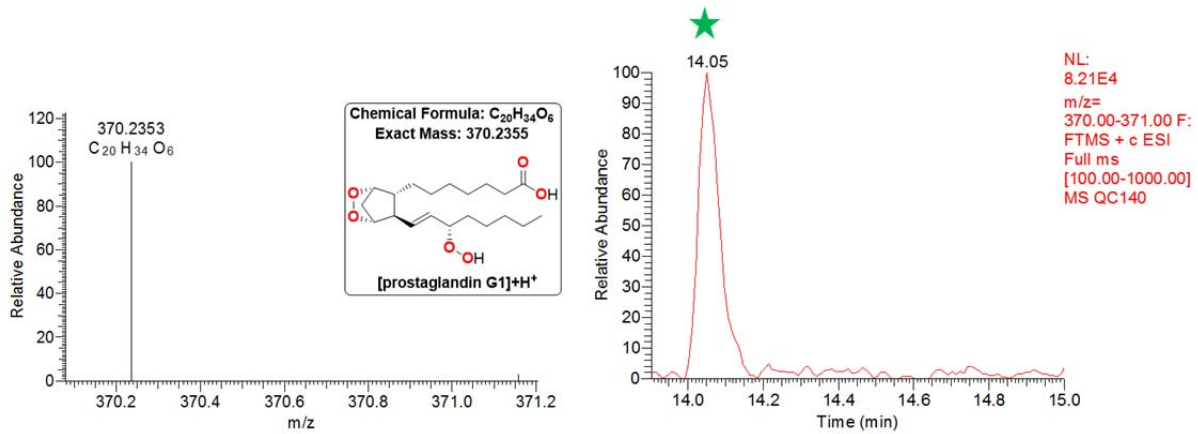

298

299 **Supplementary Figure 29** | Accurate mass data on prostaglandin G1. Raw data used to generate spectra  
 300 within this image are available within the associated MetaboLights Study upload (MTBLS598).

301

302

303

304

305

306

307

308

309

310

311

312

313

314

315

316

317

318

319

320

321

322



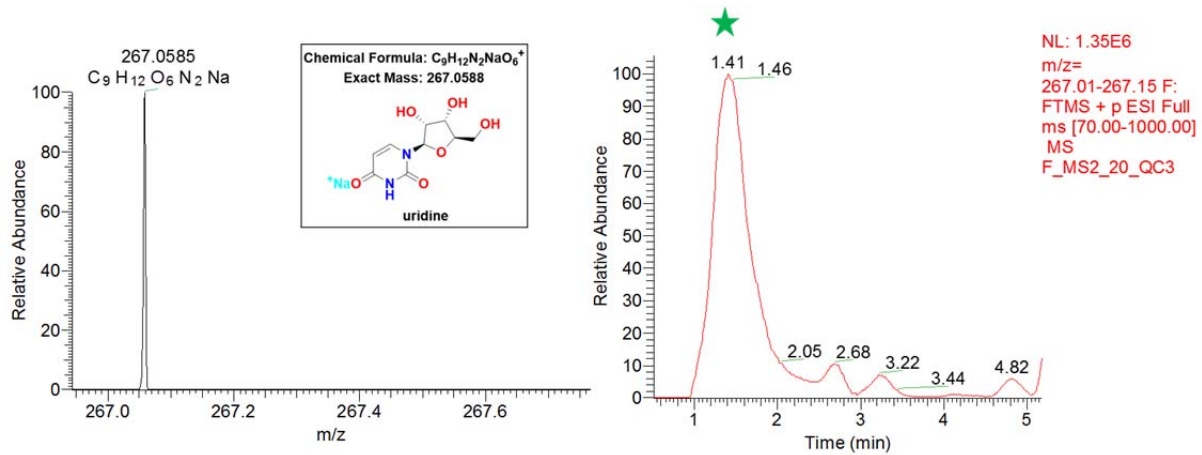

323

324 **Supplementary Figure 30** Accurate mass data on uridine. Raw data used to generate spectra within  
 325 this image are available within the associated MetaboLights Study upload (MTBLS598).

326

327

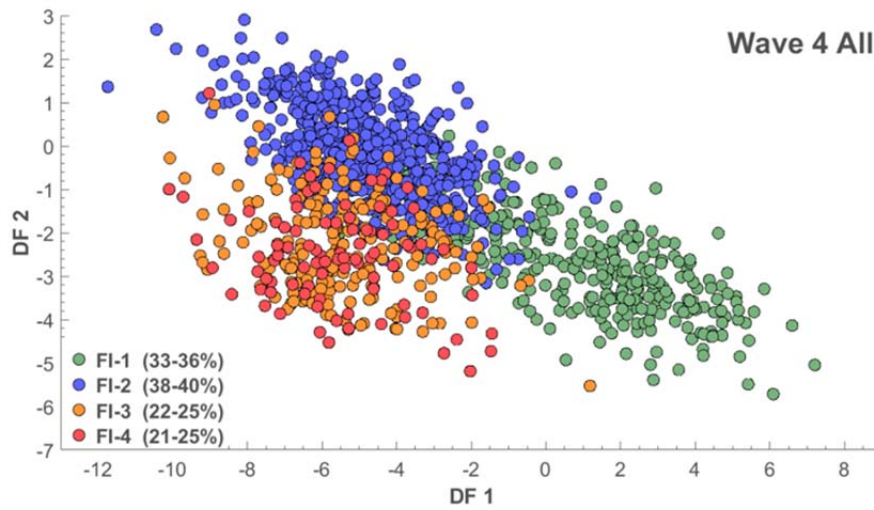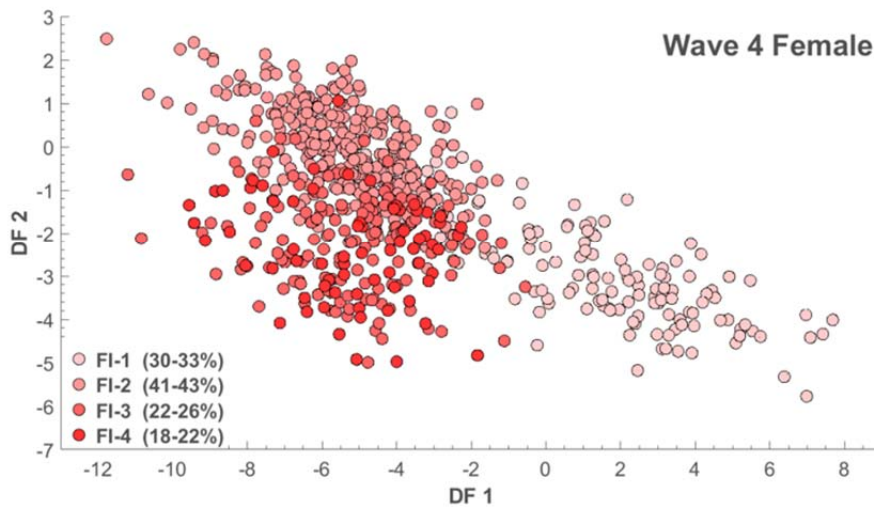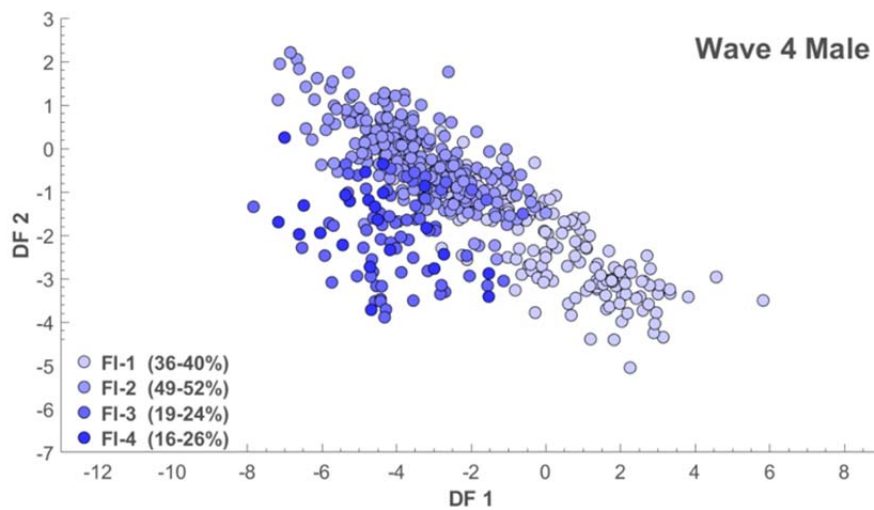

328

329 **Supplementary Figure 31** | PC-DFA of Wave 4 UHPLC-MS data stratified by sex. (Green circle = Frailty  
 330 Index 0-0.1, Blue circle – Frailty Index 0.1-0.2, Orange Circle = Frailty Index 0.2-0.3, Red Circle = Frailty  
 331 Index above 0.3). Source data are provided as a Source Data file.

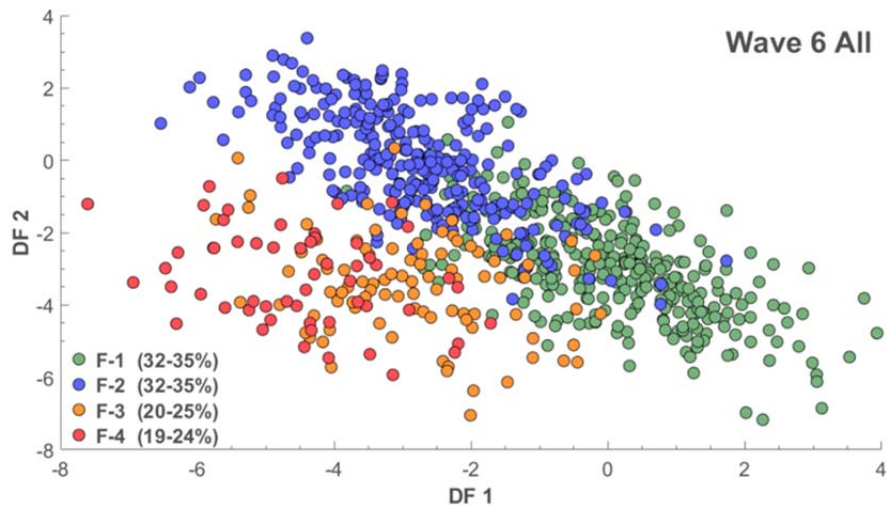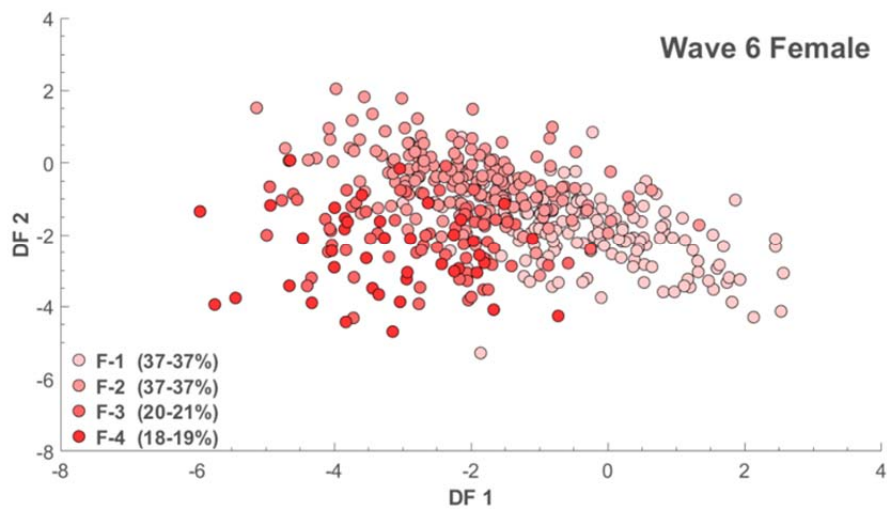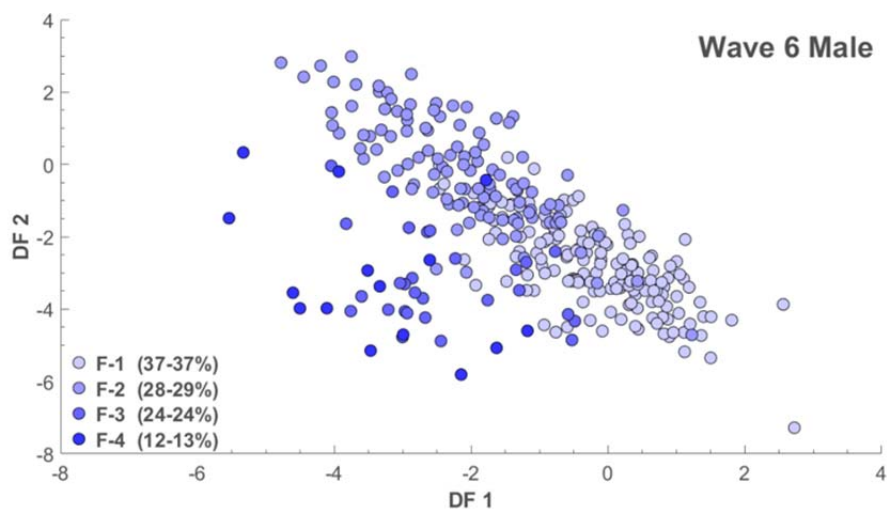

332

333 **Supplementary Figure 32** | PC-DFA of Wave 6 UHPLC-MS data stratified by sex. (Green circle = Frailty  
 334 Index 0-0.1, Blue circle – Frailty Index 0.1-0.2, Orange Circle = Frailty Index 0.2-0.3, Red Circle = Frailty  
 335 Index above 0.3). Source data are provided as a Source Data file.

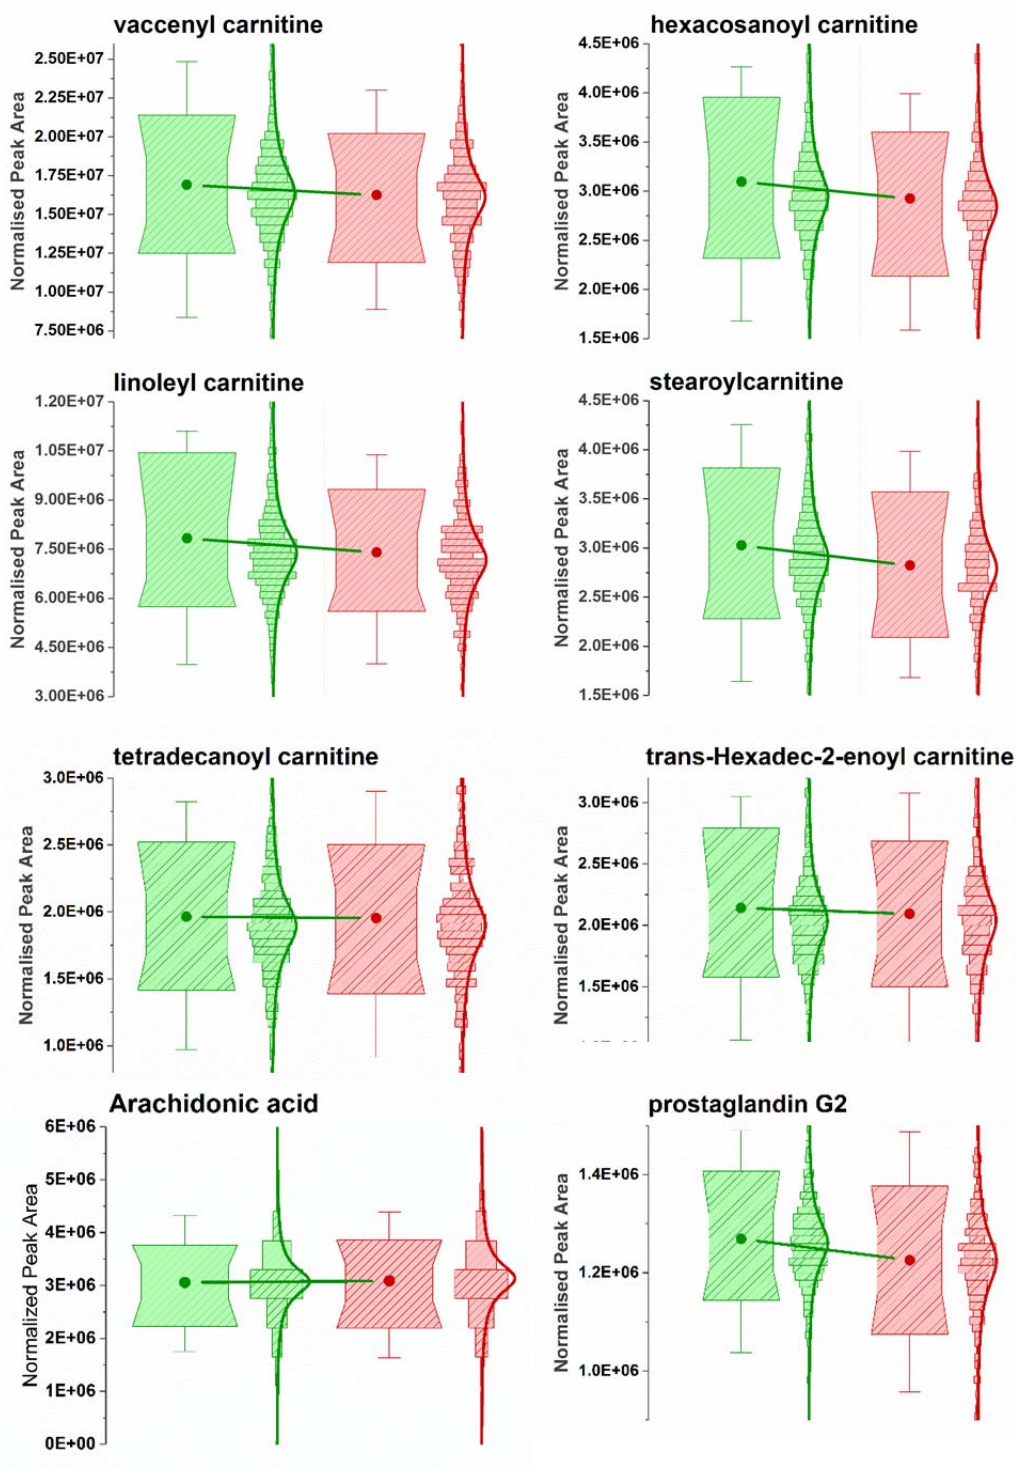

336

337

338

340

341

342

343

344

345

346

347

348

349

**Supplementary Figure 33** Metabolite box plots and bin-distributions for carnitine shuttle metabolites indicating abundance directionality from non-frail (green) to frail (red) of metabolites from the carnitine shuttle and vitamin E metabolism. Box limits cover 10<sup>th</sup>, 25<sup>th</sup>, 75<sup>th</sup> and 90<sup>th</sup> range whilst center dots indicate mean values. Whiskers represent outliers within each dataset. Source data are provided as a Meta Data file.



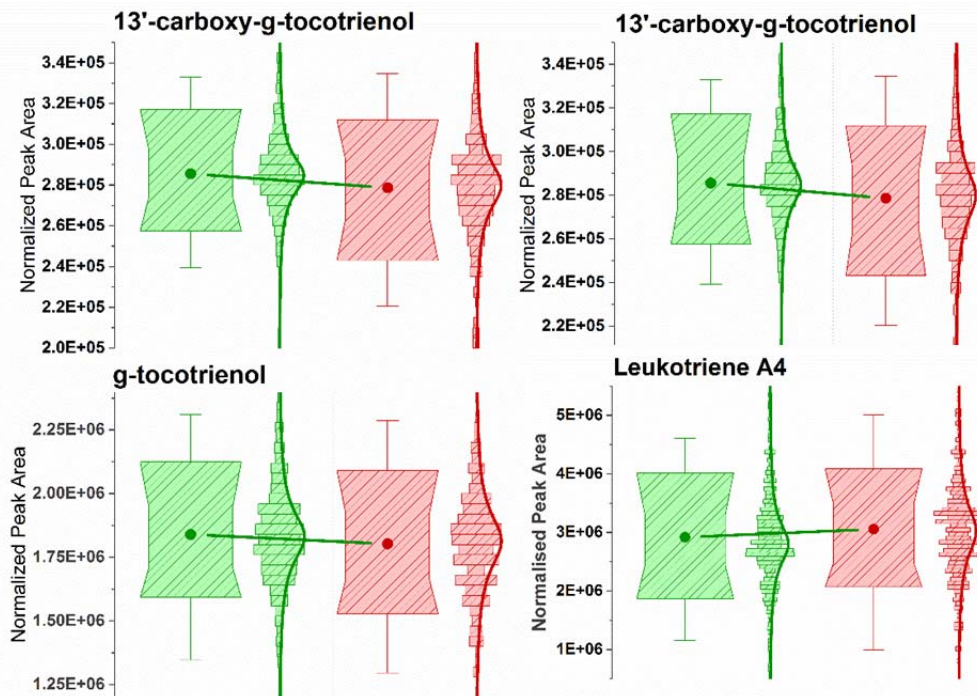

350  
 351 **Supplementary Figure 34** Metabolite box plots and bin-distributions for vitamin e related metabolites  
 352 indicating abundance directionality from non-frail (green) to frail (red) of metabolites from the carnitine  
 353 shuttle and vitamin E metabolism. Box limits cover 10<sup>th</sup>, 25<sup>th</sup>, 75<sup>th</sup> and 90<sup>th</sup> range whilst center dots  
 354 indicate mean values. Whiskers represent outliers within each dataset. Source data are provided as a  
 355 Meta Data file.

356

357

358

359 **Supplementary Table 1|** 25 Metabolites identified as significant from combined GCMS and LCMS  
 360 analysis and used in the mummichog pathway analysis to develop the cross-platform metabolic network  
 361 of frailty.  
 362

| Metabolite                            | Class                | Associated Pathway | Analytical Platform | MSI Level | Non-Frail to Frail | Detected in Wave 6 |
|---------------------------------------|----------------------|--------------------|---------------------|-----------|--------------------|--------------------|
| Glucose                               | Sugar                | Carbohydrate       | GCMS                | 1         | Up                 | N/A                |
| Citrate                               | Acid                 | Carbohydrate       | GCMS                | 1         | Up                 | N/A                |
| Butyric Acid                          | Carboxylic Acid      | Carbohydrate       | GCMS                | 1         | Down               | N/A                |
| Myo-Inositol                          | Sugar                | Carbohydrate       | GCMS                | 1         | Down               | N/A                |
| D-Mannose                             | Sugar                | Carbohydrate       | GCMS                | 1         | Up                 | N/A                |
| Fructose                              | Sugar                | Carbohydrate       | GCMS                | 1         | Down               | N/A                |
| Phosphate                             | Anion                | Multiple           | GCMS                | 1         | Down               | N/A                |
| L-Arginine                            | Amino Acid           | Multiple           | LCMS                | 1         | Up                 | NO                 |
| Uridine                               | Nucleoside           | Multiple           | LCMS                | 1         | Down               | NO                 |
| Tryptophan                            | Tryptophan           | Tryptophan         | LCMS                | 1         | Up                 | YES                |
| 5-Hydroxy-L-tryptophan                | Tryptophan           | Tryptophan         | LCMS                | 1         | Up                 | NO                 |
| Formyl-5-hydroxykynurenamine          | Tryptophan           | Tryptophan         | LCMS                | 2         | Up                 | YES                |
| Formyl-N-acetyl-5-methoxykynurenamine | Tryptophan           | Tryptophan         | LCMS                | 2         | Up                 | YES                |
| Arachidonic acid                      | Fatty Acid           | Carnitine Shuttle  | LCMS                | 1         | Down               | YES                |
| Tetradecanoyl carnitine               | Carnitine            | Carnitine Shuttle  | LCMS                | 1         | Down               | YES                |
| trans-Hexadec-2-enoyl carnitine       | Carnitine            | Carnitine Shuttle  | LCMS                | 2         | Down               | YES                |
| Linoleyl carnitine                    | Carnitine            | Carnitine Shuttle  | LCMS                | 2         | Down               | YES                |
| Vaccenyl carnitine                    | Carnitine            | Carnitine Shuttle  | LCMS                | 2         | Down               | YES                |
| Stearoylcarnitine                     | Carnitine            | Carnitine Shuttle  | LCMS                | 1         | Down               | YES                |
| Hexacosanoyl carnitine                | Carnitine            | Carnitine Shuttle  | LCMS                | 2         | Down               | YES                |
| Prostaglandin G2                      | Fatty Acid / Hormone | Carnitine Shuttle  | LCMS                | 2         | Down               | NO                 |
| Leukotriene A4                        | Fatty Acid           | Vitamin E          | LCMS                | 2         | Up                 | NO                 |
| gamma-tocotrienol                     | Tocotrienol          | Vitamin E          | LCMS                | 1         | Down               | YES                |
| 13'-carboxy-gama-tocotrienol          | Tocotrienol          | Vitamin E          | LCMS                | 2         | Down               | NO                 |
| 13'-carboxy-alpha-tocotrienol         | Tocotrienol          | Vitamin E          | LCMS                | 2         | Down               | NO                 |

363 **Supplementary Table 2**| Summary of the results of two-sample Mendelian Randomization analysis. The  
 364 results show a significant association between decreased carnitine levels and frailty (p=0.042, OR=1.53  
 365 CI=1.01-2.29) for Exposure 1. SNP=single nucleotide polymorphism, OR=odds ratio, CI=confidence  
 366 interval.

| Exposure (study)                                                     | SNP (gene)                               | Method                    | OR of frailty per 10% decrease in carnitine | 95% CI of OR | P value |
|----------------------------------------------------------------------|------------------------------------------|---------------------------|---------------------------------------------|--------------|---------|
| 1. Blood metabolite levels (unit increase) (carnitine) <sup>44</sup> | rs12356193 (SLC16A9), rs419291 (SLC22A4) | Inverse variance weighted | 1.53                                        | 1.01-2.29    | 0.042   |
| 2. Blood metabolite levels (unit decrease) (carnitine) <sup>44</sup> | rs1466788 (ALX3)                         | Wald ratio                | 0.57                                        | 0.16-2.06    | 0.391   |
| 3. Acylcarnitine levels (unit increase) (Carnitine) <sup>45</sup>    | rs1171606 (SLC16A9)                      | Wald ratio                | 0.90                                        | 0.74-1.10    | 0.300   |

367

368

369

370

371 **Supplementary References**

372 1 Tampubolon, G. Trajectories of the healthy ageing phenotype among middle-aged and older  
373 Britons, 2004–2013. *Maturitas* **88**, 9-15, (2016).

374 2 Cheshire H. *et al.* Financial Circumstances, Health and Well-being of the Older Population in  
375 England: The 2008 English Longitudinal Study of Ageing Technical Report., (London, 2012).

376
